# Supplementary material for: Rapid solid-state metathesis reactions for the formation of cobalt–iron monoboride solid-solutions and investigation of their water splitting electrocatalytic activity
Source: Royal Society of Chemistry journal article supplement (doi:10.1039/d3ma00728f), 2023-12-15
Supplement: d3ma00728f1.pdf [file d3ma00728f1.pdf]

## Supporting Information for

### Rapid solid-state metathesis reactions for the formation of cobalt-iron monoboride solid-solutions and investigation of their water splitting electrocatalytic activity

Janaka P. Abeysinghe, Edward G. Gillan\*

Department of Chemistry, University of Iowa, Iowa City, Iowa 52242

E-mail: edward-gillan@uiowa.edu

Tables and Figures are ordered as they are first referenced in the main text of the paper.

#### List of Experimental, Tabular, and Graphical Supporting Information

**Figure S1.** Images of electrochemical cell and electrode tips.

**Table S1.** Literature table for metal compounds synthesized from SSM reactions.

**Table S2.** Unit cell parameters of CoB, FeB, and  $\text{Co}_{1-x}\text{Fe}_x\text{B}$  crystalline systems.

**Figure S2.** XRD comparison of experimental and reference  $\text{Co}_{0.5}\text{Fe}_{0.5}\text{B}$ .

**Table S3.**  $2\theta$  and d-spacing values of corresponding crystal planes (hkl).

**Table S4.** Co/Fe metal ratio comparison from ICP, XRF, and EDS results.

**Figure S3.** Unit cell volume changes with ICP and EDS measurements obtained % Co values.

**Figure S4.** Additional high-magnification SEM images of metal borides.

**Figure S5.** Low-magnification SEM images of metal borides.

**Table S5.** The crystallite sizes of  $\text{Co}_{1-x}\text{Fe}_x\text{B}$  solid-solutions determined by X-ray line broadening.

**Figure S6.** TEM images of FeB, CoB, and  $\text{Co}_{1-x}\text{Fe}_x\text{B}$  solid-solutions.

**Figure S7.** Additional TEM images of metal borides and amorphous B.

**Figure S8.** A plot of calculated adiabatic temperature data of metal borides.

**Table S6.** Results of  $\text{CoCl}_2/\text{FeCl}_2/\text{Mg}$  SSM mechanistic study reactions.

**Figure S9.** Powder XRD results of  $\text{Co}_{1-x}\text{Fe}_x\text{B}$  mechanistic study.

**Figure S10.** EDS maps of  $\text{Co}_{1-x}\text{Fe}_x\text{B}$  SSM mechanistic study.

**Figure S11.** SEM images of  $\text{Co}_{1-x}\text{Fe}_x\text{B}$  SSM mechanistic study.

**Table S7.** Literature comparison table for the OER and HER activities of binary MB.

**Figure S12.** HER current density changes with % Co.

**Table S8.** Literature comparison table for the OER and HER activities of ternary MB.

**Figure S13.** HER LSV overlay and average plots for CoB, FeB, and  $\text{Co}_{1-x}\text{Fe}_x\text{B}$  in 1.0 M KOH.

**Figure S14.** HER LSV overlay plots for metal borides with 85% iR compensation.

**Figure S15.** HER LSV overlay plots for metal borides with ECSA normalized current densities.

**Table S9.** HER electrocatalysis of CoB + FeB physical mixing samples in 1.0 M KOH.

**Figure S16.** Representative HER LSV results of physically mixed CoB + FeB mixtures.

**Figure S17.** The Tafel slopes of metal borides representative HER LSV runs in 1.0 M KOH.

**Figure S18.** Applied negative potential chronoamperometry HER measurements of MBs in 1.0 M KOH.

**Table S10.** Summary of post-chronoamperometry HER electrocatalysis.

**Figure S19.** SEM surface comparison of FeB electrodes before and after electrochemistry measurements.

**Figure S20.** Powder XRD results of pre- and post- HER and OER chronoamperometry of metal borides.

**Figure S21.** Post-negative potential HER chronoamperometry EDS maps of metal borides.

**Figure S22.** EDS maps of metal borides on  $C_{\text{wax}}$  tips before electrochemistry measurements.

**Table S11.** EDS Co/Fe ratios of  $\text{Co}_{1-x}\text{Fe}_x\text{B}$  solid-solutions before and after electrochemistry measurements.

**Figure S23.** OER LSV overlay and average plots for CoB, FeB, and  $\text{Co}_{1-x}\text{Fe}_x\text{B}$  in 1.0 M KOH.

**Figure S24.** Overlays of first 6 conditioning LSV runs for OER experiments in 1.0 M KOH.

**Figure S25.** Additional oxidation peak positions of CoB and  $\text{Co}_{1-x}\text{Fe}_x\text{B}$  samples in OER.  
**Figure S26.** OER current density changes with % Co.  
**Figure S27.** OER LSV overlay plots for metal borides with 85% iR compensation.  
**Figure S28.** Applied positive potential chronoamperometry OER measurements of MBs in 1.0 M KOH.  
**Table S12.** Summary of post-chronoamperometry OER electrocatalysis.  
**Figure S29.** Post-positive potential OER chronoamperometry EDS maps of metal borides.

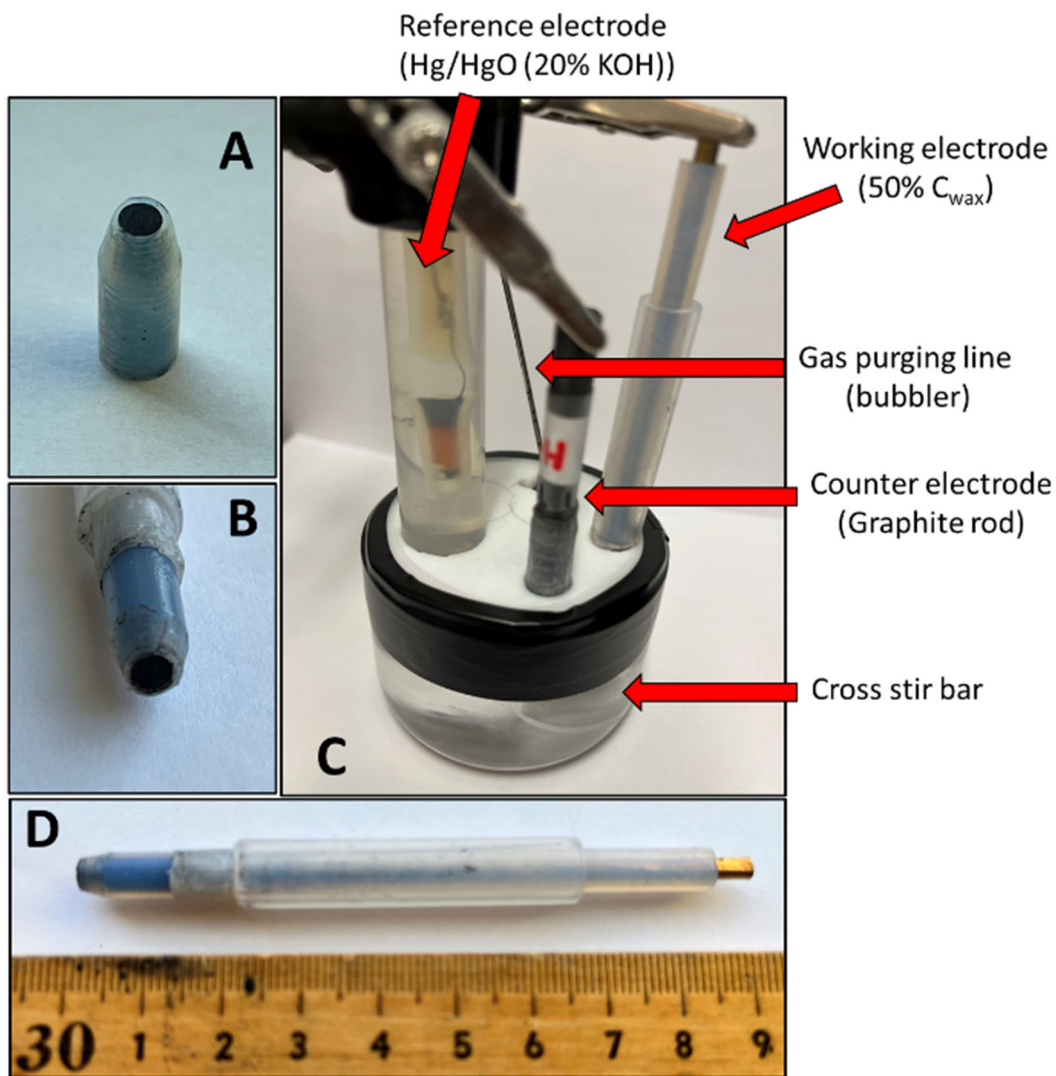

**Figure S1.** Images of electrochemical cell and electrode tip. (A) bare  $C_{wax}$  electrode tip (B)  $C_{wax}$  electrode tip with MB powder on it, (C) Three electrode electrochemical cell (working electrode- $C_{wax}$ , counter electrode-graphite rod, reference electrode- Hg/HgO (20% KOH), bubbler, and cross stir bar), (D) assembled  $C_{wax}$  electrode tip+brass rod connector.

**Table S1.** Literature table for metal compounds synthesized from SSM reactions.

RT = room temperature; Filament initiation (ignition SSM) reactions can initiate at room temperature by passing a current through nichrome/ cu wire, however locally nichrome wire temperature rises to  $\leq 850$  °C when passing the current and initiate the reaction. \* Can be named as magnesiothermic reduction reaction as well. # Not a single-phase product.

| Year | Material                                                                                                                   | Starting Materials                                       | Initiation                                                                                | Reaction Initiation Temp (°C)   | Time    | Ref. |
|------|----------------------------------------------------------------------------------------------------------------------------|----------------------------------------------------------|-------------------------------------------------------------------------------------------|---------------------------------|---------|------|
| 1995 | TiB <sub>2</sub> , ZrB <sub>2</sub> , HfB <sub>2</sub>                                                                     | MCl <sub>x</sub> +MgB <sub>2</sub>                       | Ampoule                                                                                   | 850                             | 18 h    | 1    |
|      | VB <sub>2</sub> , NbB <sub>2</sub> , TaB <sub>2</sub> , FeB, CrB <sub>2</sub> <sup>#</sup> , MoB <sub>2</sub> <sup>#</sup> |                                                          | Filament                                                                                  | RT                              | in sec  |      |
| 2002 | UB <sub>4</sub>                                                                                                            | UCl <sub>4</sub> +MgB <sub>2</sub>                       | Ampoule                                                                                   | 850                             | 1 day   | 2    |
| 2012 | MB <sub>6</sub> (M=Ca, Ba, Sr)                                                                                             | MCl <sub>2</sub> +MgB <sub>2</sub>                       | quartz tube                                                                               | 850-900 (10 <sup>-3</sup> Torr) | 12 hr   | 3    |
| 2013 | CeB <sub>6</sub> , NdB <sub>6</sub> , SmB <sub>6</sub> , EuB <sub>6</sub> , GdB <sub>6</sub> , YbB <sub>6</sub>            | MCl <sub>3</sub> .6H <sub>2</sub> O+MgB <sub>2</sub>     | Reactants in an Alsint boat covered by a silicon wafer and then inserted in a Quartz tube | 650                             | 1 hr    | 4    |
| 2017 | MoB <sub>2</sub>                                                                                                           | MoCl <sub>5</sub> +MgB <sub>2</sub>                      | Quartz tube                                                                               | 650                             | 24 hr   | 5    |
| 2019 | CrB <sub>2</sub> <sup>#</sup> , MnB <sub>4</sub> , FeB, CoB                                                                | MCl <sub>2</sub> +MgB <sub>2</sub>                       |                                                                                           | 850                             | 10 hr   | 6    |
|      | TiB <sub>2</sub> , ZrB <sub>2</sub> , HfB <sub>2</sub>                                                                     | MCl <sub>4</sub> +MgB <sub>2</sub>                       |                                                                                           | 850                             | 10 hr   |      |
|      | VB <sub>2</sub>                                                                                                            | VCl <sub>3</sub> +MgB <sub>2</sub>                       |                                                                                           | 850                             | 10 hr   |      |
|      | NbB <sub>2</sub> , TaB <sub>2</sub> , MoB <sub>2</sub>                                                                     | MCl <sub>5</sub> +MgB <sub>2</sub>                       |                                                                                           | 850                             | 10 hr   |      |
|      | WB <sub>x</sub>                                                                                                            | WCl <sub>6</sub> +MgB <sub>2</sub>                       |                                                                                           | 850                             | 10 hr   |      |
|      | ReB <sub>2</sub>                                                                                                           | K <sub>2</sub> ReCl <sub>6</sub> +MgB <sub>2</sub>       |                                                                                           | 850                             | 10 hr   |      |
|      | OsB <sub>2</sub> <sup>#</sup>                                                                                              | K <sub>2</sub> OsCl <sub>6</sub> +MgB <sub>2</sub>       |                                                                                           | 1100                            | 10 hr   |      |
|      | RuB <sub>2</sub>                                                                                                           | K <sub>2</sub> RuCl <sub>5</sub> +MgB <sub>2</sub>       |                                                                                           | 950                             | 3 hr    |      |
| 2020 | MB (M=V,Cr,Nb,Mo,Ru, Ta,W)                                                                                                 | MCl <sub>x</sub> +MgB <sub>2</sub> +Mg*                  | Quartz tube                                                                               | 800-950                         | 5-9 hr  | 7    |
| 2020 | Ru <sub>7</sub> B <sub>3</sub> , RuB                                                                                       | K <sub>2</sub> RuCl <sub>5</sub> +MgB <sub>2</sub> + Mg* | Quartz tube                                                                               | 700-950                         | 3-10 hr | 8    |
|      | Ru <sub>2</sub> B <sub>3</sub> , RuB <sub>2</sub>                                                                          | K <sub>2</sub> RuCl <sub>5</sub> +MgB <sub>2</sub>       |                                                                                           |                                 |         |      |
| 2022 | FeB, CoB, NiB <sup>#</sup>                                                                                                 | MCl <sub>x</sub> +MgB <sub>2</sub>                       | Filament                                                                                  | RT                              | In sec  | 9    |
|      | FeB, CoB, NiB                                                                                                              | MCl <sub>x</sub> +Mg+(x/2)B *                            |                                                                                           |                                 |         |      |

**Table S2.** Unit cell parameters of CoB, FeB, and Co<sub>1-x</sub>Fe<sub>x</sub>B crystalline systems.

|                                                                             | Co % | a (Å)  | b (Å)  | c (Å)  | Cell volume (Å <sup>3</sup> ) |
|-----------------------------------------------------------------------------|------|--------|--------|--------|-------------------------------|
| <b>CoB standard pattern (PDF 04-003-2122)</b>                               |      | 3.948  | 5.243  | 3.037  | 62.9                          |
| <b>CoB</b>                                                                  | 100  | 3.9557 | 5.2498 | 3.0417 | 63.2                          |
| <b>CoB (conv.)</b>                                                          | 100  | 5.2498 | 3.0417 | 3.9557 | 63.2                          |
| <b>Co<sub>0.8</sub>Fe<sub>0.2</sub>B</b>                                    | 80   | 5.3177 | 3.0166 | 3.9793 | 63.8                          |
| <b>Co<sub>0.6</sub>Fe<sub>0.4</sub>B</b>                                    | 60   | 5.3718 | 2.9949 | 3.9981 | 64.3                          |
| <b>Co<sub>0.5</sub>Fe<sub>0.5</sub>B</b>                                    | 50   | 5.3984 | 2.9806 | 4.012  | 64.6                          |
| <b>Co<sub>0.4</sub>Fe<sub>0.6</sub>B</b>                                    | 40   | 5.424  | 2.973  | 4.0276 | 64.9                          |
| <b>Co<sub>0.2</sub>Fe<sub>0.8</sub>B</b>                                    | 20   | 5.4713 | 2.9563 | 4.0454 | 65.4                          |
| <b>FeB</b>                                                                  | 0    | 5.5006 | 2.9476 | 4.0600 | 65.8                          |
| <b>FeB standard pattern (PDF 04-013-1637)</b>                               | 0    | 5.504  | 2.945  | 4.056  | 65.7                          |
| <b>Co<sub>0.5</sub>Fe<sub>0.5</sub>B standard pattern (PDF 01-079-2846)</b> | 50   | 5.4042 | 2.9803 | 4.0072 | 64.5                          |

CoB, FeB, and Co<sub>0.5</sub>Fe<sub>0.5</sub>B (CoFeB<sub>2</sub>) crystallize in the orthorhombic crystal system. However, space groups of CoB (Pnma) are different from FeB and Co<sub>0.5</sub>Fe<sub>0.5</sub>B (Pnma). The unit cell growth of CoB along a, b, and c axis are different from FeB or Co<sub>1-x</sub>Fe<sub>x</sub>B solid-solutions. The a, b, and c values of CoB swapped to match with FeB and Co<sub>1-x</sub>Fe<sub>x</sub>B cell directions are also shown (blue-color values).

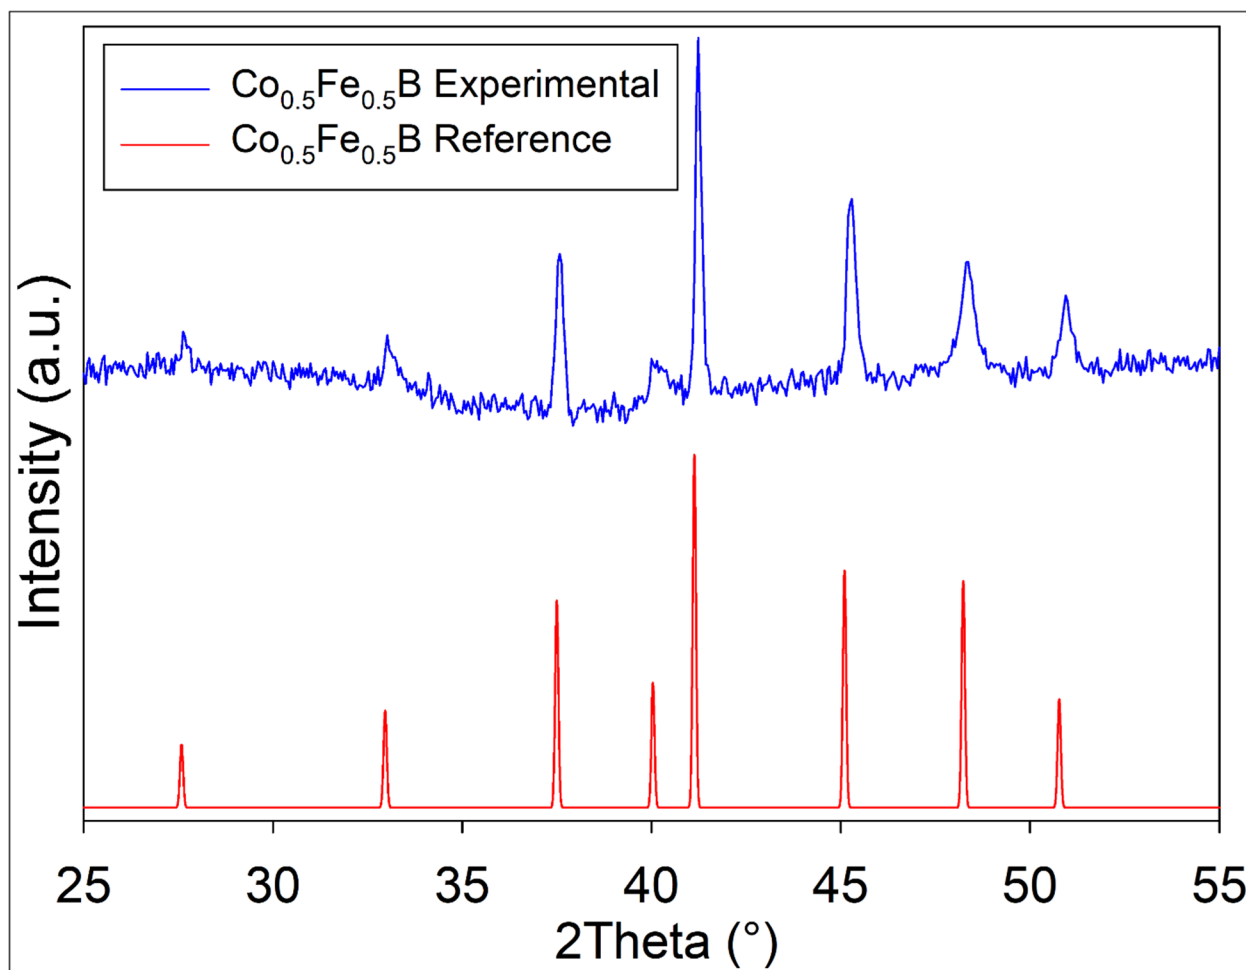

**Figure S2.** XRD comparison of experimentally obtained versus reference  $\text{Co}_{0.5}\text{Fe}_{0.5}\text{B}$  (PDF 01-079-2846).

**Table S3a.** 2 $\theta$  and d-spacing values of crystal planes (hkl) of FeB, Co<sub>0.2</sub>Fe<sub>0.8</sub>B, Co<sub>0.4</sub>Fe<sub>0.6</sub>B, and Co<sub>0.5</sub>Fe<sub>0.5</sub>B. Peak alignment was made using an internal Si standard.

| hkl        | FeB     |            | Co <sub>0.2</sub> Fe <sub>0.8</sub> B |            | Co <sub>0.4</sub> Fe <sub>0.6</sub> B |            | Co <sub>0.5</sub> Fe <sub>0.5</sub> B |            |
|------------|---------|------------|---------------------------------------|------------|---------------------------------------|------------|---------------------------------------|------------|
|            | d (Å)   | 2 $\theta$ | d (Å)                                 | 2 $\theta$ | d (Å)                                 | 2 $\theta$ | d (Å)                                 | 2 $\theta$ |
| <b>101</b> | 3.26656 | 27.3008    | 3.25282                               | 27.4184    | 3.23360                               | 27.5846    | 3.22012                               | 27.6785    |
| <b>200</b> | 2.75030 | 32.5558    | 2.73565                               | 32.7351    | 2.71200                               | 33.0287    | 2.69919                               | 33.1612    |
| <b>011</b> | 2.38526 | 37.7123    | 2.38688                               | 37.6858    | 2.39193                               | 37.6032    | 2.39258                               | 37.5598    |
| <b>201</b> | 2.27703 | 39.5777    | 2.26614                               | 39.7759    | 2.24955                               | 40.0817    | 2.23953                               | 40.2335    |
| <b>111</b> | 2.18837 | 41.2526    | 2.18775                               | 41.2647    | 2.18857                               | 41.2487    | 2.18737                               | 41.2360    |
| <b>210</b> | 2.01089 | 45.0842    | 2.00788                               | 45.1557    | 2.00360                               | 45.2573    | 2.00071                               | 45.2860    |
| <b>102</b> | 1.90445 | 47.7559    | 1.89720                               | 47.9496    | 1.88788                               | 48.2014    | 1.88039                               | 48.3621    |
| <b>211</b> | 1.80198 | 50.6571    | 1.79853                               | 50.7611    | 1.79389                               | 50.9017    | 1.79044                               | 50.9608    |
| <b>301</b> | 1.67103 | 54.9462    | 1.66262                               | 55.2479    | 1.64943                               | 55.7279    | 1.64188                               | 55.9554    |
| <b>112</b> | 1.59962 | 57.6228    | 1.59669                               | 57.7383    | 1.59371                               | 57.8565    | 1.59035                               | 57.9368    |
| <b>020</b> | 1.47380 | 63.0768    | 1.47815                               | 62.8699    | 1.48650                               | 62.4769    | 1.49028                               | 62.2422    |

**Table S3b.** 2 $\theta$  and d-spacing values of crystal planes (hkl) of Co<sub>0.6</sub>Fe<sub>0.4</sub>B, Co<sub>0.8</sub>Fe<sub>0.2</sub>B, and CoB.

| hkl        | Co <sub>0.6</sub> Fe <sub>0.4</sub> B |            | Co <sub>0.8</sub> Fe <sub>0.2</sub> B |            | CoB        |         |            |
|------------|---------------------------------------|------------|---------------------------------------|------------|------------|---------|------------|
|            | d (Å)                                 | 2 $\theta$ | d (Å)                                 | 2 $\theta$ | hkl        | d (Å)   | 2 $\theta$ |
| <b>101</b> | 3.20730                               | 27.8154    | 3.18604                               | 28.0047    | <b>110</b> | 3.15925 | 28.2471    |
| <b>200</b> | 2.68590                               | 33.3590    | 2.65885                               | 33.7084    | <b>020</b> | 2.62490 | 34.1577    |
| <b>011</b> | 2.39699                               | 37.5209    | 2.40392                               | 37.4086    | <b>101</b> | 2.41126 | 37.2905    |
| <b>201</b> | 2.22952                               | 40.4575    | 2.21077                               | 40.8159    | <b>111</b> | 2.19119 | 41.1972    |
| <b>111</b> | 2.18895                               | 41.2411    | 2.19050                               | 41.2107    | <b>120</b> | 2.18717 | 41.2764    |
| <b>210</b> | 1.99907                               | 45.3655    | 1.98967                               | 45.5919    | <b>021</b> | 1.98724 | 45.6509    |
| <b>102</b> | 1.87355                               | 48.5939    | 1.86350                               | 48.8728    | <b>210</b> | 1.85085 | 49.2290    |
| <b>211</b> | 1.78838                               | 51.0698    | 1.78316                               | 51.2300    | <b>121</b> | 1.77575 | 51.4594    |
| <b>301</b> | 1.63419                               | 56.2934    | 1.61919                               | 56.8622    | <b>130</b> | 1.60033 | 57.5946    |
| <b>112</b> | 1.58835                               | 58.0703    | 1.58539                               | 58.1893    | <b>211</b> | 1.58114 | 58.3607    |
| <b>020</b> | 1.49745                               | 61.9693    | 1.50828                               | 61.4758    | <b>002</b> | 1.52085 | 60.9135    |

**Table S4.** Co/Fe metal ratio comparison from ICP, XRF, and EDS results.

| <b>SSM reaction molar ratios</b>                       | <b>Final Products</b>                   | <b>Theoretical Co/Fe</b> | <b>ICP Co/Fe</b> | <b>XRF Co/Fe</b> | <b>EDS Co/Fe</b> |
|--------------------------------------------------------|-----------------------------------------|--------------------------|------------------|------------------|------------------|
| <b>4CoCl<sub>2</sub>/FeCl<sub>2</sub>/5Mg/10B</b>      | Co <sub>0.8</sub> Fe <sub>0.2</sub> B+B | 80/20                    | 81/19            | 78/22            | 78/22            |
| <b>3CoCl<sub>2</sub>/2FeCl<sub>2</sub>/5Mg/10B</b>     | Co <sub>0.6</sub> Fe <sub>0.4</sub> B+B | 60/40                    | 58/42            | -                | 55/45            |
| <b>2.5CoCl<sub>2</sub>/2.5FeCl<sub>2</sub>/5Mg/10B</b> | Co <sub>0.5</sub> Fe <sub>0.5</sub> B+B | 50/50                    | 48/52            | 49/51            | 45/55            |
| <b>2CoCl<sub>2</sub>/3FeCl<sub>2</sub>/5Mg/10B</b>     | Co <sub>0.4</sub> Fe <sub>0.6</sub> B+B | 40/60                    | 38/62            | -                | 33/67            |
| <b>CoCl<sub>2</sub>/4FeCl<sub>2</sub>/5Mg/10B</b>      | Co <sub>0.2</sub> Fe <sub>0.8</sub> B+B | 20/80                    | 17/83            | 21/79            | 19/81            |



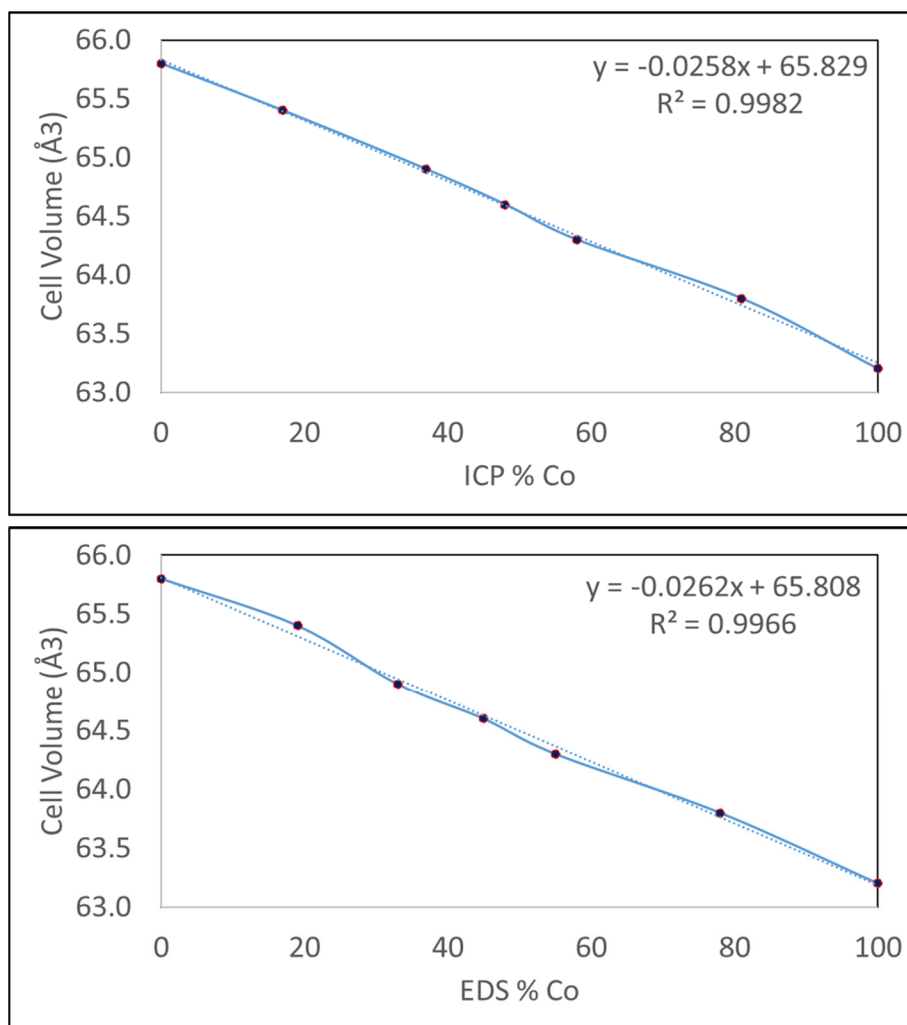

**Figure S3.** Unit cell volume changes with ICP and EDS measurements obtained %Co values of  $\text{Co}_{1-x}\text{Fe}_x\text{B}$  solid-solutions. Dashed lines are linear regression results.

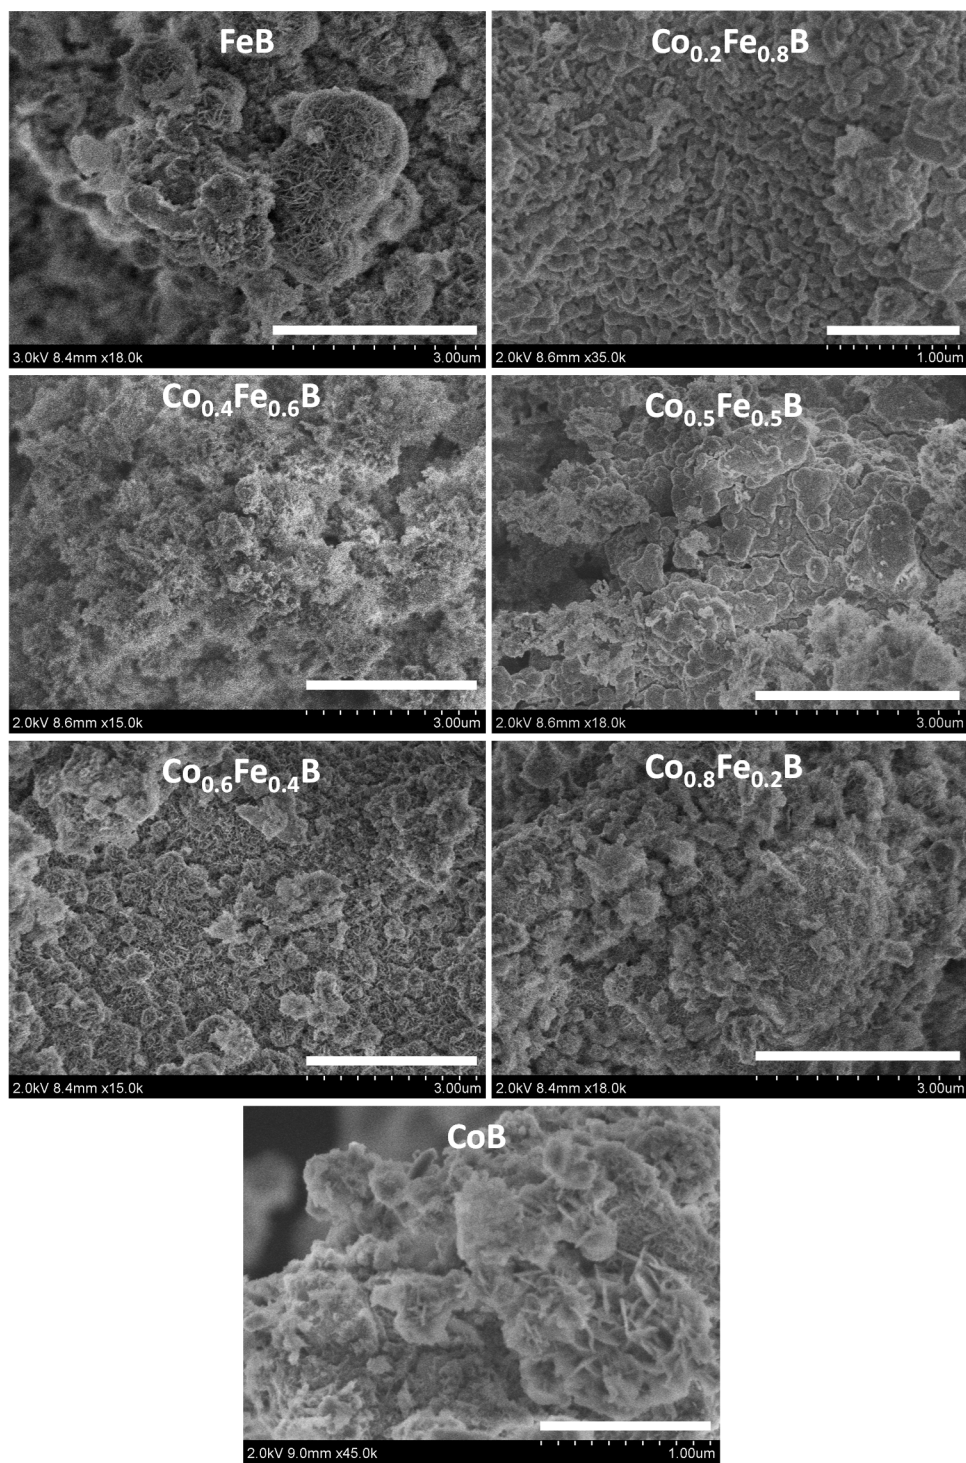

**Figure S4.** Additional high-magnification SEM images of FeB,  $\text{Co}_{1-x}\text{Fe}_x\text{B}$  solid-solutions, and CoB. In all samples vertically grown plate-like structure morphology can be observed that may receive on metal boride surfaces after washing out  $\text{MgCl}_2$  byproduct from product. The lengths of the scale bars: FeB,  $\text{Co}_{0.4}\text{Fe}_{0.6}\text{B}$ ,  $\text{Co}_{0.5}\text{Fe}_{0.5}\text{B}$ ,  $\text{Co}_{0.6}\text{Fe}_{0.4}\text{B}$ , and  $\text{Co}_{0.8}\text{Fe}_{0.2}\text{B}$  are  $3\ \mu\text{m}$  and  $\text{Co}_{0.2}\text{Fe}_{0.8}\text{B}$  and CoB are  $1\ \mu\text{m}$ .

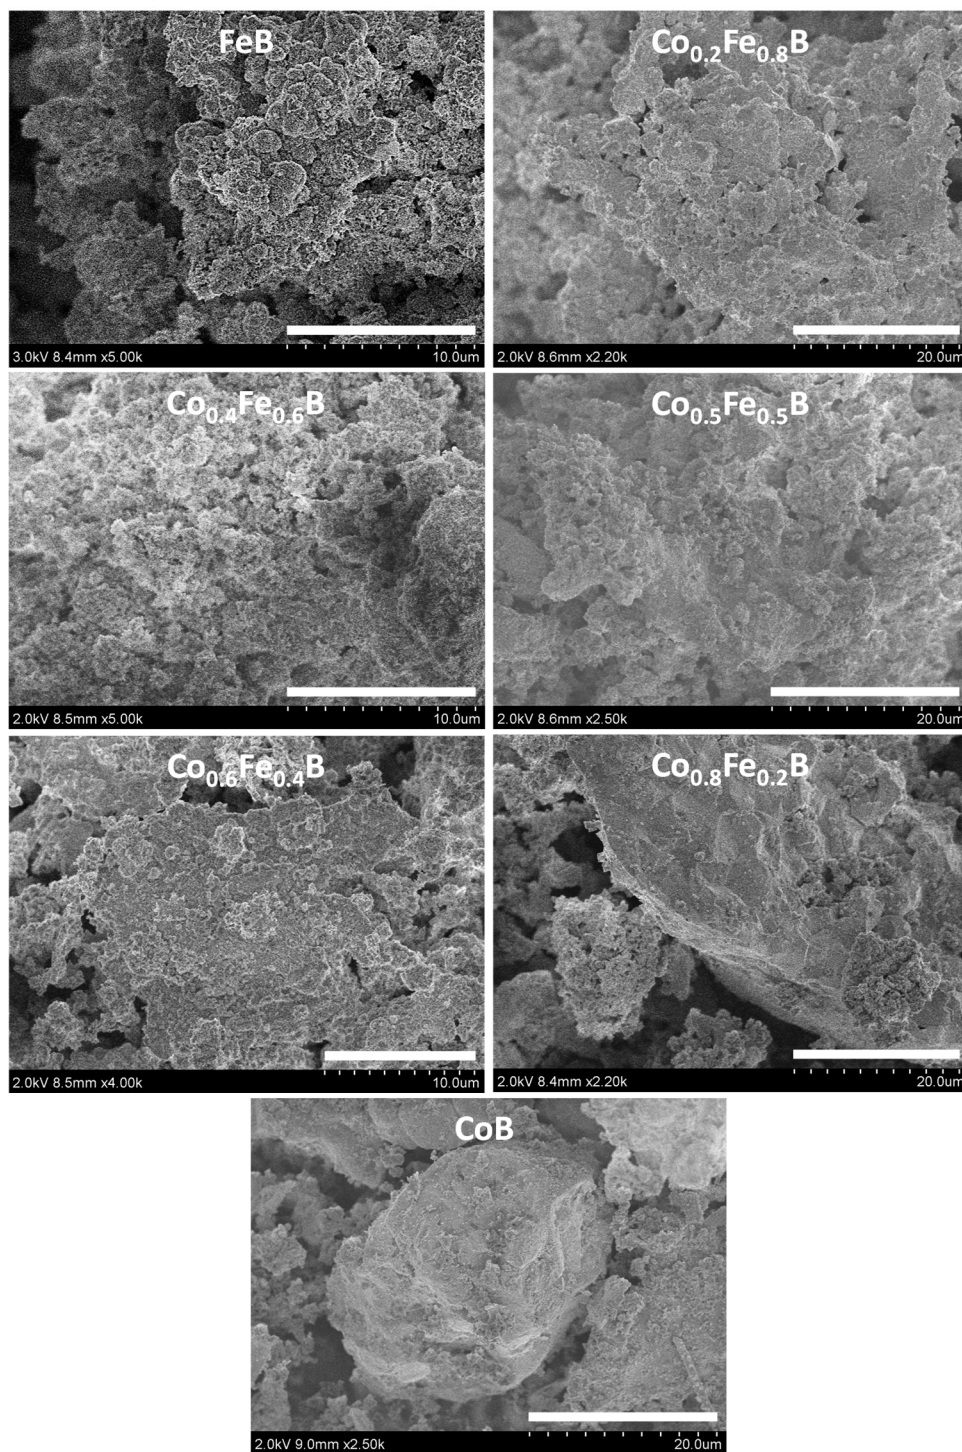

**Figure S5.** Low-magnification SEM images of FeB,  $\text{Co}_{1-x}\text{Fe}_x\text{B}$  solid-solutions, and CoB. Apparent morphology transformation from aggregates of small and round-shaped FeB particles to large ( $\mu\text{m}$ -sized) monolithic blocks + aggregate particles of CoB through  $\text{Co}_{1-x}\text{Fe}_x\text{B}$  solid-solutions can be seen from these low-magnification images. The lengths of the scale bars: FeB,  $\text{Co}_{0.4}\text{Fe}_{0.6}\text{B}$ , and  $\text{Co}_{0.6}\text{Fe}_{0.4}\text{B}$  are 10  $\mu\text{m}$  and  $\text{Co}_{0.2}\text{Fe}_{0.8}\text{B}$ ,  $\text{Co}_{0.5}\text{Fe}_{0.5}\text{B}$ ,  $\text{Co}_{0.8}\text{Fe}_{0.2}\text{B}$ , and CoB are 20  $\mu\text{m}$ .

**Table S5.** The crystallite sizes of  $\text{Co}_{1-x}\text{Fe}_x\text{B}$  solid-solutions determined by X-ray line broadening.

| Metal boride        | CoB         | $\text{Co}_{0.8}\text{Fe}_{0.2}\text{B}$ | $\text{Co}_{0.6}\text{Fe}_{0.4}\text{B}$ | $\text{Co}_{0.5}\text{Fe}_{0.5}\text{B}$ | $\text{Co}_{0.4}\text{Fe}_{0.6}\text{B}$ | $\text{Co}_{0.2}\text{Fe}_{0.8}\text{B}$ | FeB         |
|---------------------|-------------|------------------------------------------|------------------------------------------|------------------------------------------|------------------------------------------|------------------------------------------|-------------|
| Sample 1 (nm)       | 43.9        | 49.5                                     | 60.4                                     | 66.0                                     | 58.0                                     | 69.0                                     | 67.5        |
| Sample 2 (nm)       | 52.5        | 50.9                                     | 60.4                                     | 73.4                                     | 61.4                                     | 60.8                                     | 62.0        |
| <b>Average (nm)</b> | <b>48.2</b> | <b>50.2</b>                              | <b>60.4</b>                              | <b>69.7</b>                              | <b>59.7</b>                              | <b>64.9</b>                              | <b>64.8</b> |

The (220) XRD peak at  $47.3^\circ 2\theta$  of Si powder was used for instrument broadening and the (111) peaks of metal borides ( $41.236^\circ$ ) were used for the calculations. Two different sample scan results were obtained for each metal boride using Scherrer and Warren equations.

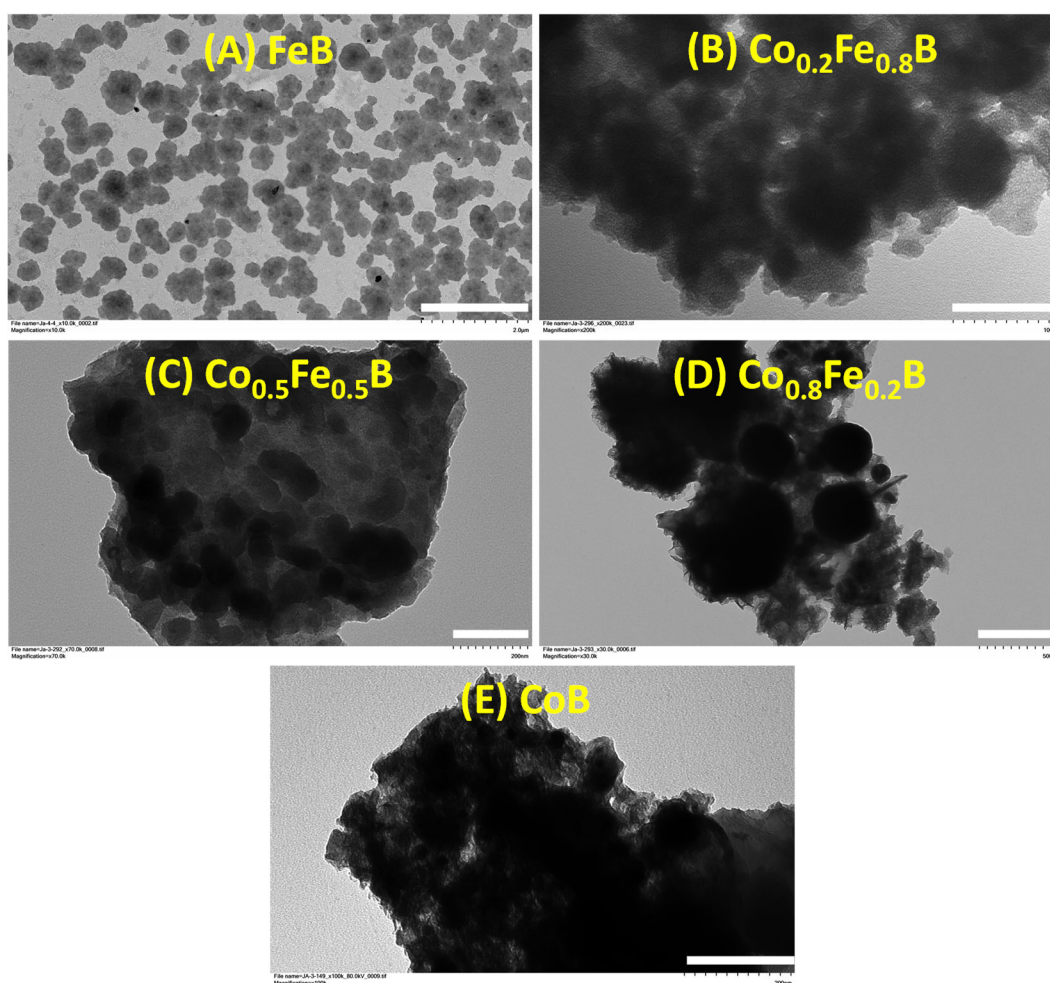

**Figure S6.** TEM images of FeB, CoB, and  $\text{Co}_{1-x}\text{Fe}_x\text{B}$  solid-solutions. Scale bar length for images: (A) 2  $\mu\text{m}$ , (B) 100 nm, (C) 200 nm, (D) 500 nm, (E) 200 nm.

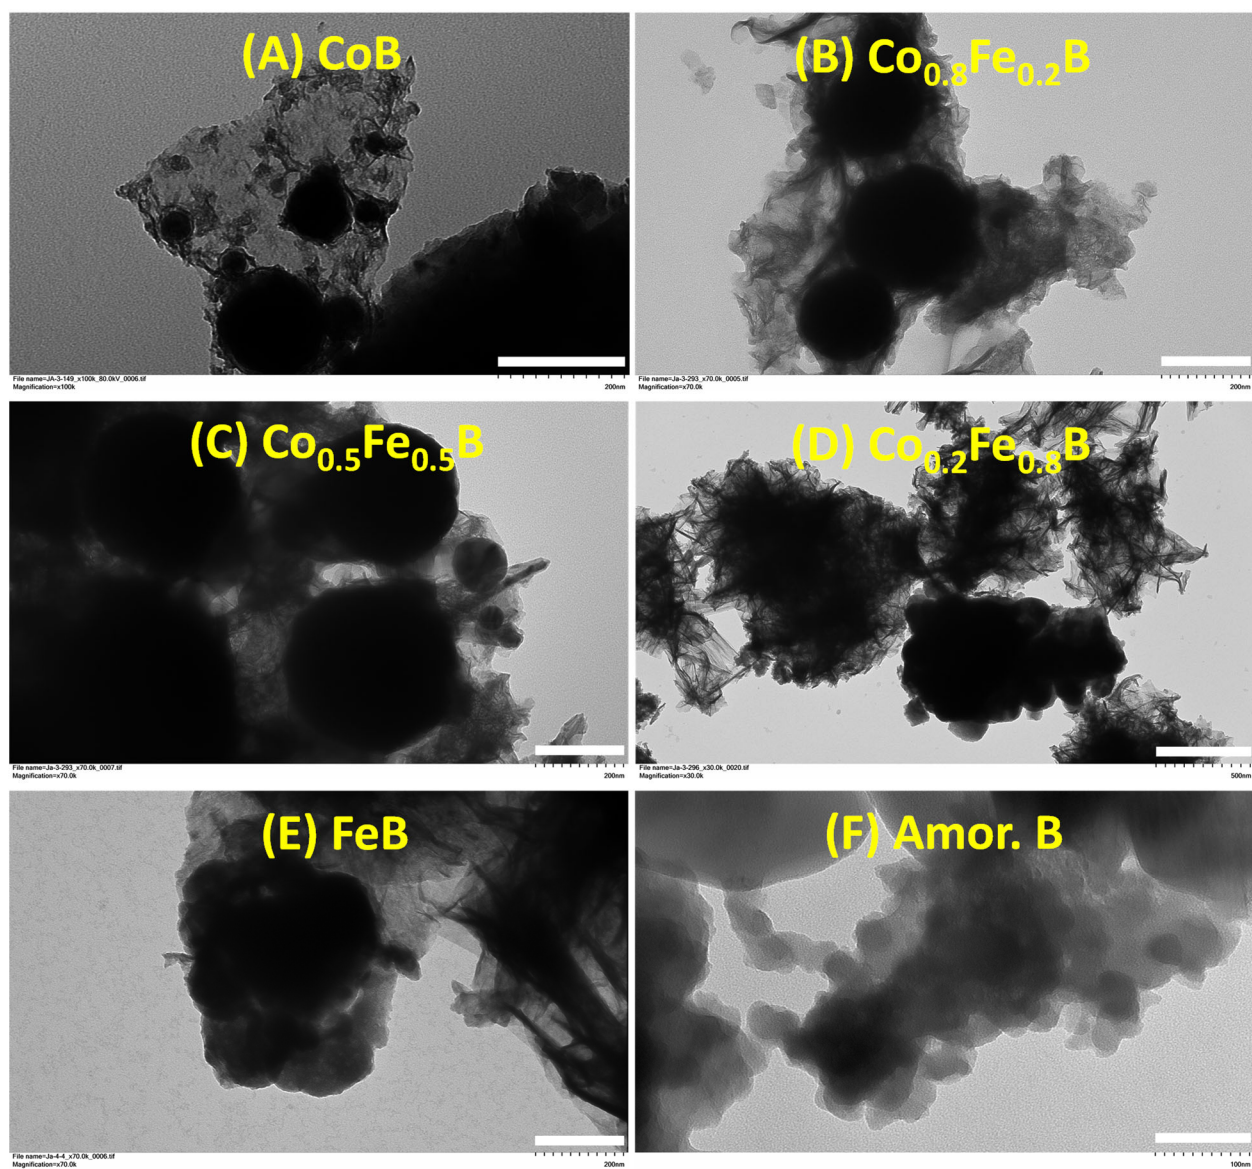

**Figure S7.** Additional TEM images of  $\text{Co}_{1-x}\text{Fe}_x\text{B}$  solid-solutions, FeB, CoB, and amorphous B. Scale bar lengths: (A), (B), (C), (E) – 200 nm, (D) – 500 nm, (F) – 100 nm.

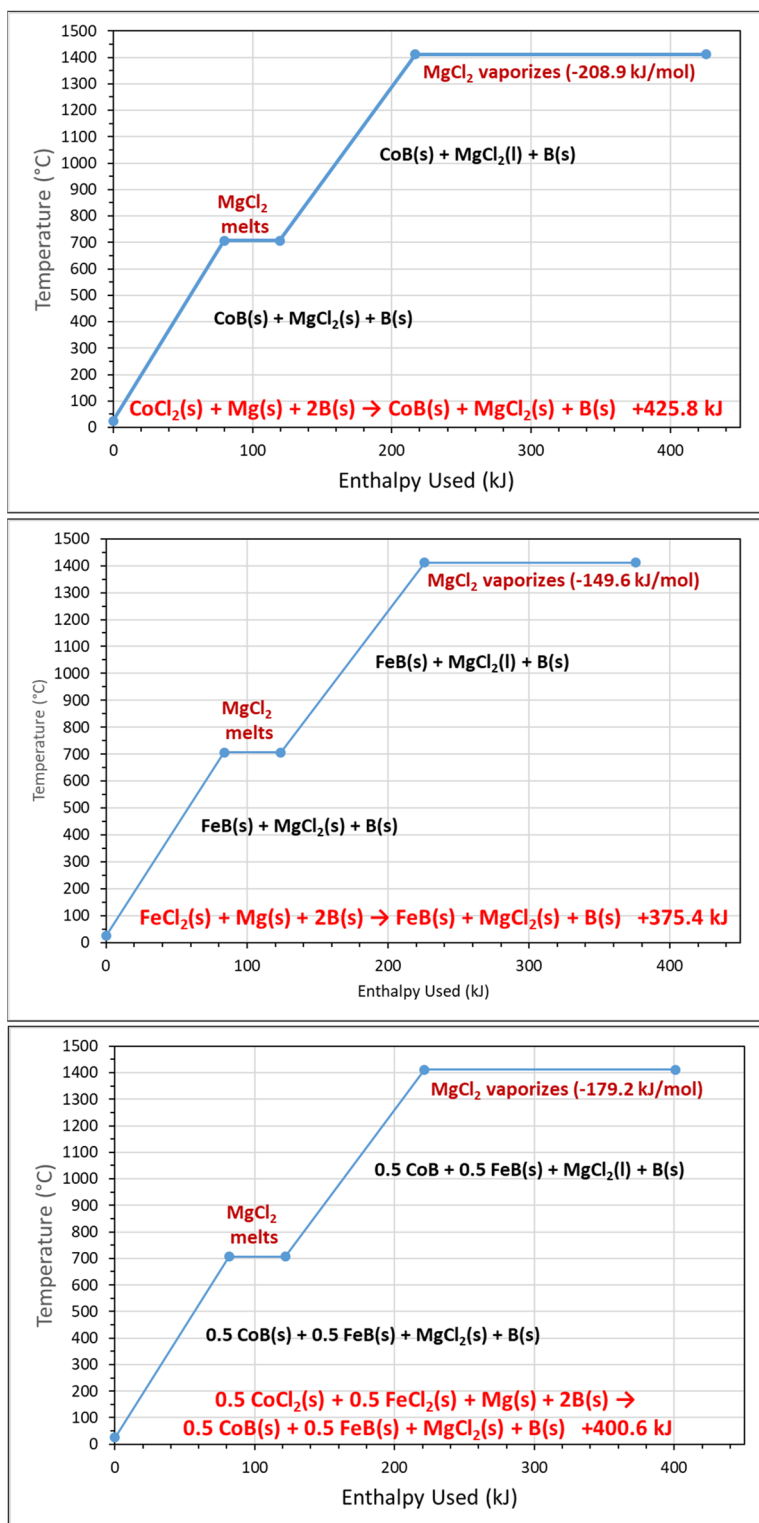

**Figure S8.** A plot of calculated adiabatic temperature data for CoB, FeB, and 0.5CoB+0.5FeB ( $\text{Co}_{0.5}\text{Fe}_{0.5}\text{B}$ ) samples. Data points were calculated using the heat of reaction, standard heat capacities, and phase change energies. All three samples temperature-enthalpy graphs are very similar except reaction final step,  $\text{MgCl}_2$  vaporization, acquired different enthalpies and resulting different % of  $\text{MgCl}_2$  vaporizations (CoB: 100%, FeB: 72%,  $\text{Co}_{0.5}\text{Fe}_{0.5}\text{B}$ : 86%).

## Sample calculations for reaction heat and adiabatic temperature

All thermochemical data of compounds were obtained from several thermochemical reference sources.<sup>10, 11</sup>

**SSM reactions enthalpy calculations.** An example of a thermochemical  $\Delta H_{rxn}$  calculation that was done using Hess's Law for the 4CoCl<sub>2</sub>/FeCl<sub>2</sub>/5Mg/10B reaction. Since shortage of thermochemistry data of Co<sub>1-x</sub>Fe<sub>x</sub>B solid solutions, CoB and FeB formation separately considered for the calculations.

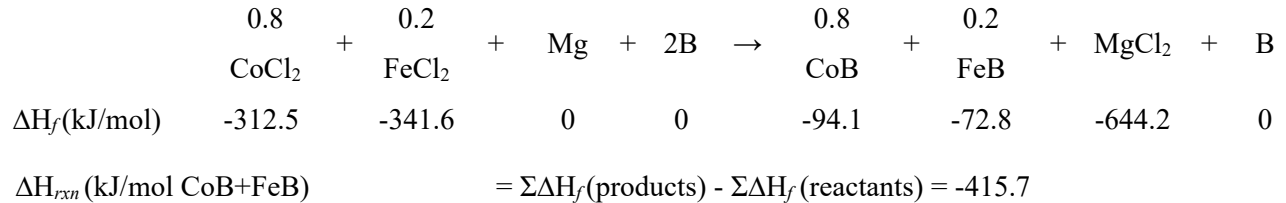

**Maximum adiabatic reaction temperature (T<sub>ad</sub>) calculations.** For the T<sub>ad</sub> calculations, complete reaction progress and no heat loss of reactions were assumed. Even though SSM reactions are very rapid, some heat loss from the reactor to the surrounding environment is possible in practice. As a result, actual maximum reaction temperatures may be lower than calculated adiabatic reaction temperatures (T<sub>ad</sub>). The standard molar heat capacities (298 K and 1 atm) were used for solid compounds and molar heat capacities at melting and boiling temperatures were selected as the heat capacity of compounds in liquid and gas phases at 298 K.<sup>10</sup> Molar heat capacities of materials (mostly solids) generally increase with temperature, so the T<sub>ad</sub> values represent upper limits of likely temperatures reached in these SSM reactions.

The T<sub>ad</sub> calculation of 4CoCl<sub>2</sub>/FeCl<sub>2</sub>/5Mg/10B reaction.

|                                                          |                                                     |                                           |                                          |
|----------------------------------------------------------|-----------------------------------------------------|-------------------------------------------|------------------------------------------|
| 0.8 CoCl <sub>2</sub> + 0.2 FeCl <sub>2</sub> + Mg + 2 B | →                                                   | 0.8 CoB + 0.2 FeB + MgCl <sub>2</sub> + B | $\Delta H^{\circ}_{rxn}$ -415.7 (kJ/mol) |
| $\Delta H^{\circ}_f$ (kJ/mol)                            |                                                     | -312.5   -341.6   0   0                   | -94.1   -72.8   -644.2   0               |
| mp (C)                                                   |                                                     | 721   677   650   2077                    | 1460   1590   707   2077                 |
| bp (C)                                                   |                                                     | 1081   1020   1093   3866                 | 1412   3866                              |
| Heat of fusion (kJ/mol)                                  |                                                     |                                           | 62.66   62.66   40.0                     |
| Heat of vaporization (kJ/mol)                            |                                                     |                                           | 209.1                                    |
| C <sub>p</sub> (j/mol K) (solid)                         |                                                     |                                           | 34.6   41.0   71.3   10.71               |
| C <sub>p</sub> (j/mol K) (liquid)                        |                                                     |                                           | 61.5   68.3   92.8   31.75               |
| C <sub>p</sub> (j/mol K) (gas)                           |                                                     |                                           | 57.1   20.8                              |
| $\Delta H = Cp\Delta T$                                  |                                                     |                                           |                                          |
| 25 °C - 707 °C                                           | Products heat up to MgCl <sub>2</sub> melting temp. | 80.4                                      |                                          |
| 707 °C                                                   | MgCl <sub>2</sub> (s) → MgCl <sub>2</sub> (l)       | 40.0                                      |                                          |
| 707 °C - 1412 °C                                         | Products heat up to MgCl <sub>2</sub> boiling temp. | 98.3                                      |                                          |
| 1412 °C                                                  | MgCl <sub>2</sub> (l) → MgCl <sub>2</sub> (g)       | 209.1                                     |                                          |
| Final T <sub>ad</sub> = 1412 °C                          |                                                     |                                           |                                          |

**Table S6.** Results for  $x\text{CoCl}_2 + (1-x)\text{FeCl}_2 + \text{Mg}$  rapid SSM reactions.

| Reaction                                              | % Yield based on target metal M | $\Delta H_f$ (kJ/mol) | Magnetic attraction |
|-------------------------------------------------------|---------------------------------|-----------------------|---------------------|
| <b>0.8CoCl<sub>2</sub> / 0.2FeCl<sub>2</sub> / Mg</b> | 55                              | -326                  | strong              |
| <b>0.5CoCl<sub>2</sub> / 0.5FeCl<sub>2</sub> / Mg</b> | 49                              | -317                  | strong              |
| <b>0.2CoCl<sub>2</sub> / 0.8FeCl<sub>2</sub> / Mg</b> | 46                              | -308                  | strong              |

All three products are ferromagnetic at room temperature, and they qualitatively show strong attraction to a permanent magnet.

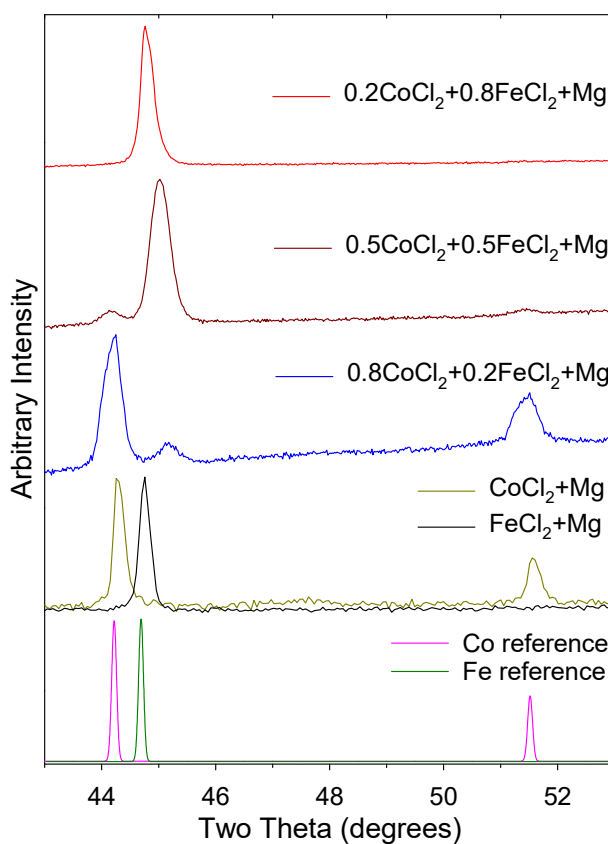

**Figure S9.** Powder XRD results of the  $(1-x)\text{CoCl}_2/x\text{FeCl}_2/\text{Mg}$  mechanistic study 1<sup>st</sup> half-reactions.



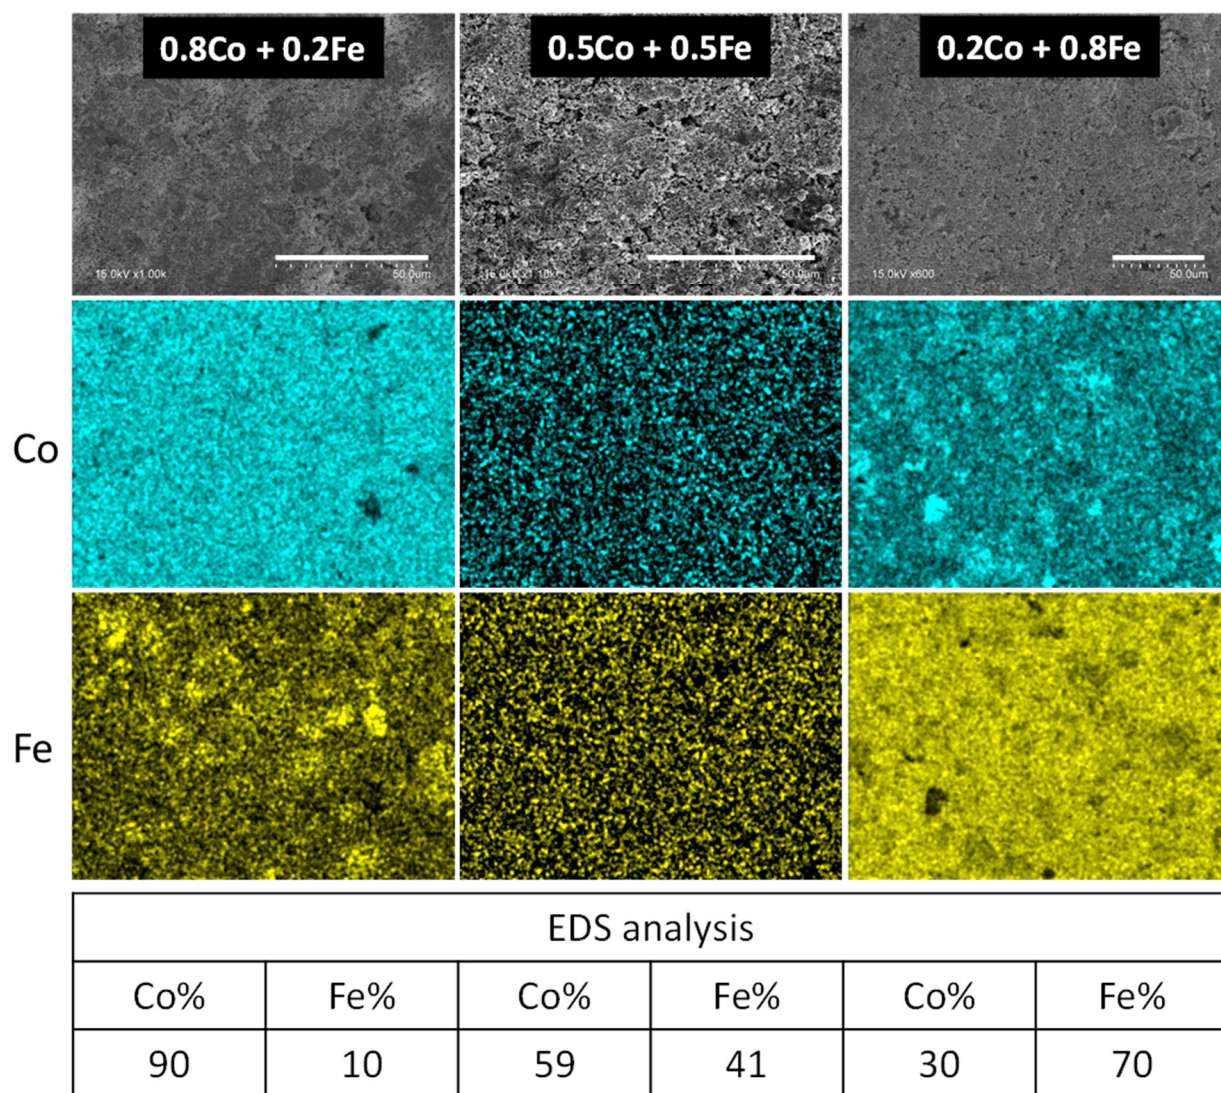

**Figure S10.** EDS maps of (A) 0.8Co/0.2Fe, (B) 0.5Co/0.5Fe, and (C) 0.2Co/0.8Fe formed from  $x \text{CoCl}_2 + (1-x) \text{FeCl}_2 + \text{Mg}$  mechanistic study reactions. The length of the scale bars are: (A, B, C) 50  $\mu\text{m}$ .

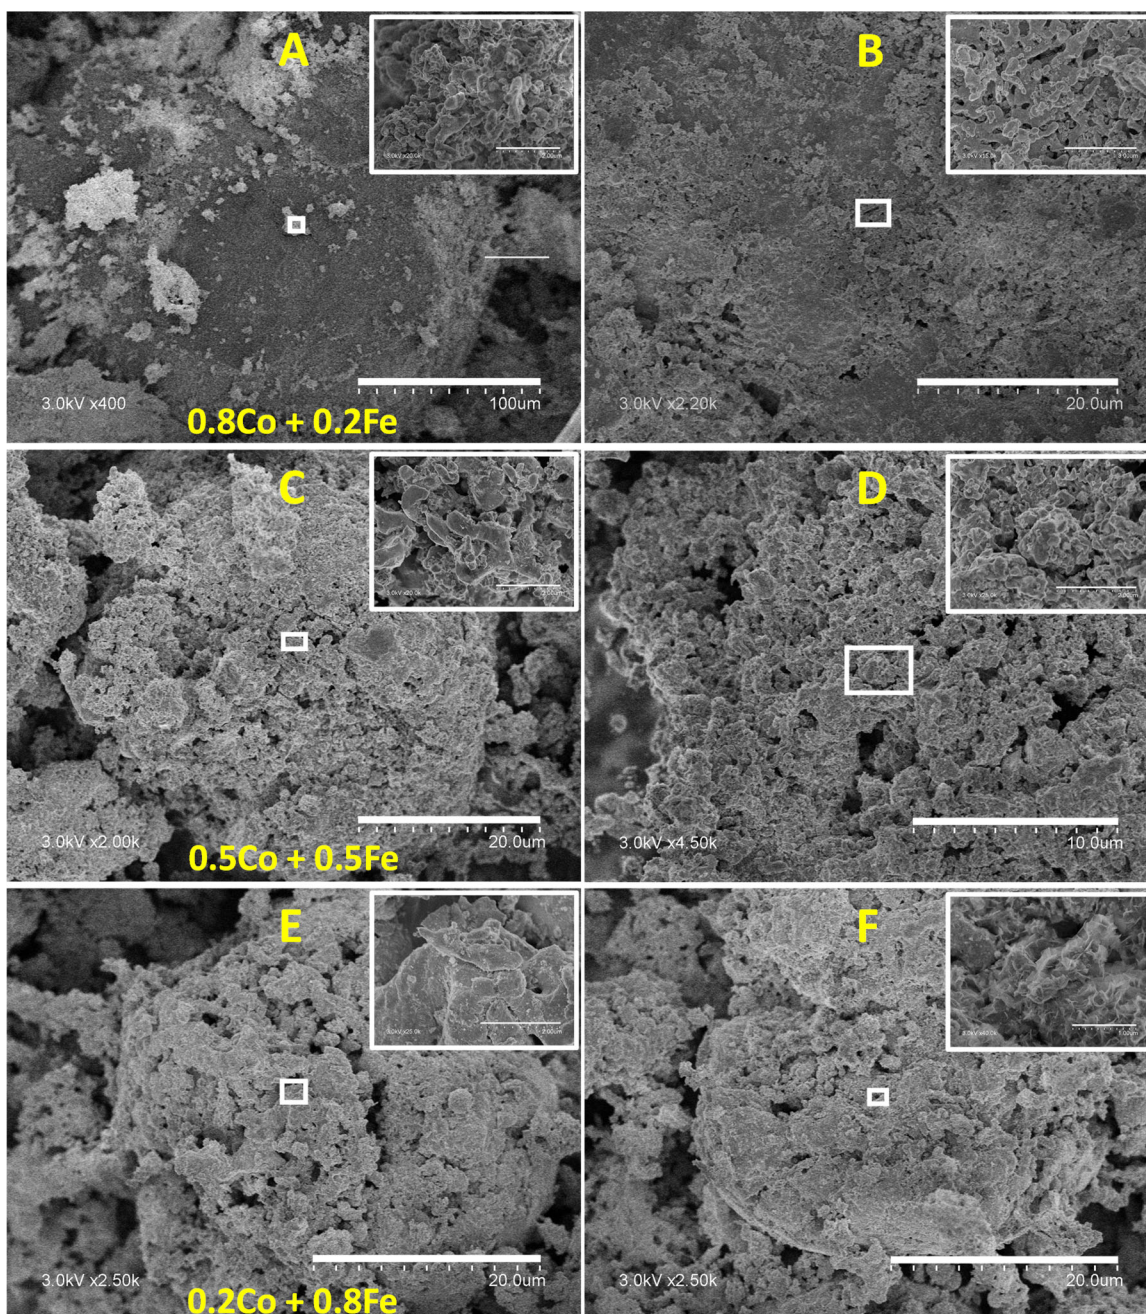

**Figure S11.** Scanning electron microscopy (SEM) comparison of particle morphologies obtained from SSM reactions of  $x\text{CoCl}_2 + (1-x)\text{FeCl}_2 + \text{Mg}$  producing (A and B) 0.8Co/0.2Fe, (C and D) 0.5Co/0.5Fe, and (E and F) 0.2Co/0.8Fe (left column and right column are two representative SEM images of the same sample). Insets show a high magnification view of the highlighted white boxes in the low magnification images. The lengths of the scale bars are (main image, inset): (A) 100  $\mu\text{m}$  and 2  $\mu\text{m}$ , (B) 20  $\mu\text{m}$  and 3  $\mu\text{m}$ , (C) 20  $\mu\text{m}$  and 2  $\mu\text{m}$ , (D) 10  $\mu\text{m}$  and 2  $\mu\text{m}$ , (E) 20  $\mu\text{m}$  and 2  $\mu\text{m}$ , (F) 20  $\mu\text{m}$  and 1  $\mu\text{m}$ .

**Table S7.** Literature comparison table for crystalline and amorphous binary metal boride OER and HER activity in different electrolytes. All current densities are normalized for the geometric electrode area. The  $\eta_{10}$  overpotentials are calculated versus the ideal equilibrium 0 V and 1.23 V potentials for HER and OER water splitting.

| MB<br>(M= Fe, Co, Ni)                         | Electrode            | OER<br>( $\eta_{10}$ mV) | HER<br>( $\eta_{10}$ mV) | Tafel slope<br>(mV/dec)<br>OER/HER | Electrolyte                          | Ref.       |
|-----------------------------------------------|----------------------|--------------------------|--------------------------|------------------------------------|--------------------------------------|------------|
| <b>Crystalline metal borides (Co and Fe)</b>  |                      |                          |                          |                                    |                                      |            |
| CoB (CoCl <sub>2</sub> /Mg/2B)                | 50% C <sub>wax</sub> | 345                      | -223                     | 95/105                             | 1.0 M KOH                            | this study |
| FeB (FeCl <sub>2</sub> /Mg/2B)                | 50% C <sub>wax</sub> | 456                      | -395                     | 52/136                             | 1.0 M KOH                            | this study |
| FeB (FeCl <sub>3</sub> /1.5MgB <sub>2</sub> ) | 45% C <sub>wax</sub> | 418                      | -368                     | 78/157                             | 1.0 M KOH                            | 9          |
| FeB (FeCl <sub>3</sub> /1.5Mg/B)              | 45% C <sub>wax</sub> | 480                      | -361                     | 116/155                            | 1.0 M KOH                            | 9          |
| CoB (CoCl <sub>2</sub> /MgB <sub>2</sub> )    | 45% C <sub>wax</sub> | 373                      | -293                     | 54/109                             | 1.0 M KOH                            | 9          |
| CoB (CoCl <sub>2</sub> /Mg/2B)                | 45% C <sub>wax</sub> | 382                      | -279                     | 69/100                             | 1.0 M KOH                            | 9          |
| FeB <sub>2</sub>                              | GC                   | 296                      | -61                      | 52/88                              | 1.0 M KOH                            | 12         |
| Co <sub>3</sub> B                             | CP                   | 312                      |                          | 53                                 | 1.0 M KOH                            | 13         |
| Co <sub>2</sub> B                             | GC                   | 410                      |                          | 63                                 | 1.0 M KOH                            | 14         |
| Co <sub>2</sub> B                             |                      | 380                      |                          | 45                                 | 0.1 M KOH                            | 15         |
| Co <sub>2</sub> B                             | GC                   |                          | -328                     | 136, 177                           | 1.0 M KOH                            | 15         |
| Co <sub>2</sub> B                             | CP                   | 287                      |                          | 51                                 | 1.0 M KOH                            | 13         |
| CoB                                           | CP                   | 340                      |                          | 63                                 | 1.0 M KOH                            | 13         |
| <b>Crystalline metal borides (Other)</b>      |                      |                          |                          |                                    |                                      |            |
| NiB (NiCl <sub>2</sub> /MgB <sub>2</sub> )    | 45% C <sub>wax</sub> | 380                      | -312                     | 72*/112                            | 1.0 M KOH                            | 9          |
| NiB (NiCl <sub>2</sub> /Mg/2B)                | 45% C <sub>wax</sub> | 346                      | -307                     | 67*/111                            | 1.0 M KOH                            | 9          |
| Ni <sub>3</sub> B                             | -                    |                          | -79                      | 85                                 | 0.5 M H <sub>2</sub> SO <sub>4</sub> | 16         |
| NiB                                           | GC                   | 350                      |                          | 60                                 | 1.0 M KOH                            | 17         |
| Nano VB <sub>2</sub>                          | CS                   |                          | -192                     | 68                                 | 0.5 M H <sub>2</sub> SO <sub>4</sub> | 18         |
| Bulk VB <sub>2</sub>                          | CS                   |                          | -348                     | 126                                | 0.5 M H <sub>2</sub> SO <sub>4</sub> | 18         |
| TiB <sub>2</sub>                              | GC                   |                          | -1070                    | 196                                | 0.5 M H <sub>2</sub> SO <sub>4</sub> | 19         |
| TiB <sub>2</sub>                              | FTO                  | 560                      |                          |                                    | 1.0 M HClO <sub>4</sub>              | 20         |
| TiB <sub>2</sub>                              | GC                   |                          | ~-1100                   |                                    | 0.5 M H <sub>2</sub> SO <sub>4</sub> | 21         |
| TiB <sub>2</sub> -NaNAFT                      | GC                   |                          | ~-1000                   | 146                                | 0.5 M H <sub>2</sub> SO <sub>4</sub> | 21         |
| TiB <sub>2</sub> -BuLi                        | GC                   |                          | ~-1000                   | 158                                | 0.5 M H <sub>2</sub> SO <sub>4</sub> | 21         |
| ZrB <sub>2</sub>                              | GC                   |                          | -970                     | 173                                | 0.5 M H <sub>2</sub> SO <sub>4</sub> | 19         |
| MoB/g-C <sub>3</sub> N <sub>4</sub>           | GC                   |                          | -152 ( $\eta_{20}$ )     | 46                                 | 1.0 M KOH                            | 22         |
| MoB <sub>2</sub>                              | CS                   |                          | -154                     | 49                                 | 0.5 M H <sub>2</sub> SO <sub>4</sub> | 5          |
| Mo <sub>2</sub> B <sub>5</sub>                | GC                   |                          | -740                     | 118                                | 0.5 M H <sub>2</sub> SO <sub>4</sub> | 23         |
| Mo <sub>2</sub> B <sub>5</sub> -BP treated    | GC                   |                          | -540                     | 101                                | 0.5 M H <sub>2</sub> SO <sub>4</sub> | 23         |
| RuB <sub>2</sub>                              | GC                   |                          | -28                      | 29                                 | 1.0 M KOH                            | 6          |
| RuB <sub>2</sub>                              | GC                   |                          | -18                      | 39                                 | 0.5 M H <sub>2</sub> SO <sub>4</sub> | 6          |
| RuB <sub>2</sub>                              | GC                   |                          | -35                      | 28                                 | 0.5 M H <sub>2</sub> SO <sub>4</sub> | 24         |
| HfB <sub>2</sub>                              | GC                   |                          | -1050                    | 194                                | 0.5 M H <sub>2</sub> SO <sub>4</sub> | 19         |
| WB <sub>2</sub>                               | GC                   |                          | -203                     | 65                                 | 0.5 M H <sub>2</sub> SO <sub>4</sub> | 24         |
| W <sub>2</sub> B <sub>5</sub>                 | GC                   |                          | -680                     | 115                                | 0.5 M H <sub>2</sub> SO <sub>4</sub> | 23         |
| W <sub>2</sub> B <sub>5</sub> -BP treated     | GC                   |                          | -210                     | 62                                 | 0.5 M H <sub>2</sub> SO <sub>4</sub> | 23         |

| Amorphous metal borides                           |     |                     |                      |         |                         |    |
|---------------------------------------------------|-----|---------------------|----------------------|---------|-------------------------|----|
| FeB                                               | GC  | 392 ( $\eta_{20}$ ) |                      | 72      | 1.0 M KOH               | 25 |
| Co <sub>3</sub> B                                 | GC  | 350 ( $\eta_{20}$ ) |                      |         | 1.0 M KOH               | 26 |
| CoB pellet                                        | -   |                     | -251                 | 75      | 0.5 M KPi               | 27 |
| CoB                                               | GC  |                     | -203                 | 79      | 0.5 M KPi               | 28 |
| CoB                                               | GC  | 344 ( $\eta_{20}$ ) |                      | 72      | 1.0 M KOH               | 25 |
| CoB/C                                             | GC  | 320                 |                      | 75      | 1.0 M KOH               | 29 |
| CoB nanosheets                                    | NF  | 265 ( $\eta_{20}$ ) |                      | 56      | 1.0 M KOH               | 30 |
| CoB/NCNT                                          |     | 370                 |                      | -       | 0.1 M KOH               | 31 |
| CoB                                               | Ni  | 140                 | -70                  | 89/68   | 1.0 M KOH               | 31 |
| Co-B@Co-Bi                                        | GC  | 291                 |                      | 105     | 1.0 M KOH               | 32 |
| CoB                                               | GC  | 348                 |                      | 111     | 1.0 M KOH               | 32 |
| Ni <sub>3</sub> B-rGO films                       | CFP | 290                 |                      | 88      | 1.0 M KOH               | 33 |
| Ni <sub>3</sub> B                                 | CFP | 340                 |                      | 81      | 1.0 M KOH               | 33 |
| Ni <sub>2</sub> B                                 | GC  | 350                 |                      | 58      | 1.0 M KOH               | 34 |
| NiB                                               | GC  |                     | -132 ( $\eta_{20}$ ) | 53, 112 | 1.0 M HClO <sub>4</sub> | 35 |
| NiB                                               | GC  |                     | -194 ( $\eta_{20}$ ) |         | 1.0 M KOH               | 35 |
| NiB                                               | GC  |                     | -309                 | 186     | 0.5 M KPi               | 28 |
| Ni <sub>2</sub> B/g-C <sub>3</sub> N <sub>4</sub> | GC  |                     | -707                 | 221     | 1.0 M KOH               | 36 |
| Ni-B@Ni-Bi                                        | GC  | 310                 |                      | 150     | 1.0 M KOH               | 32 |
| NiB                                               | GC  | 365                 |                      | 100     | 1.0 M KOH               | 32 |
| NiB                                               | GC  | 331 ( $\eta_{20}$ ) |                      | 52      | 1.0 M KOH               | 25 |

50% C<sub>wax</sub> = 50% graphite/50% paraffine wax, 45% C<sub>wax</sub> = 45% graphite/55% paraffin wax, GC = glassy carbon, CP = carbon paper, CS = carbon sheet, FTO = fluorinated tin oxide glass, CFP = carbon fiber paper, NF = nickel foam \*Approximate values due to pre-oxidation peaks having overlap with OER onset.

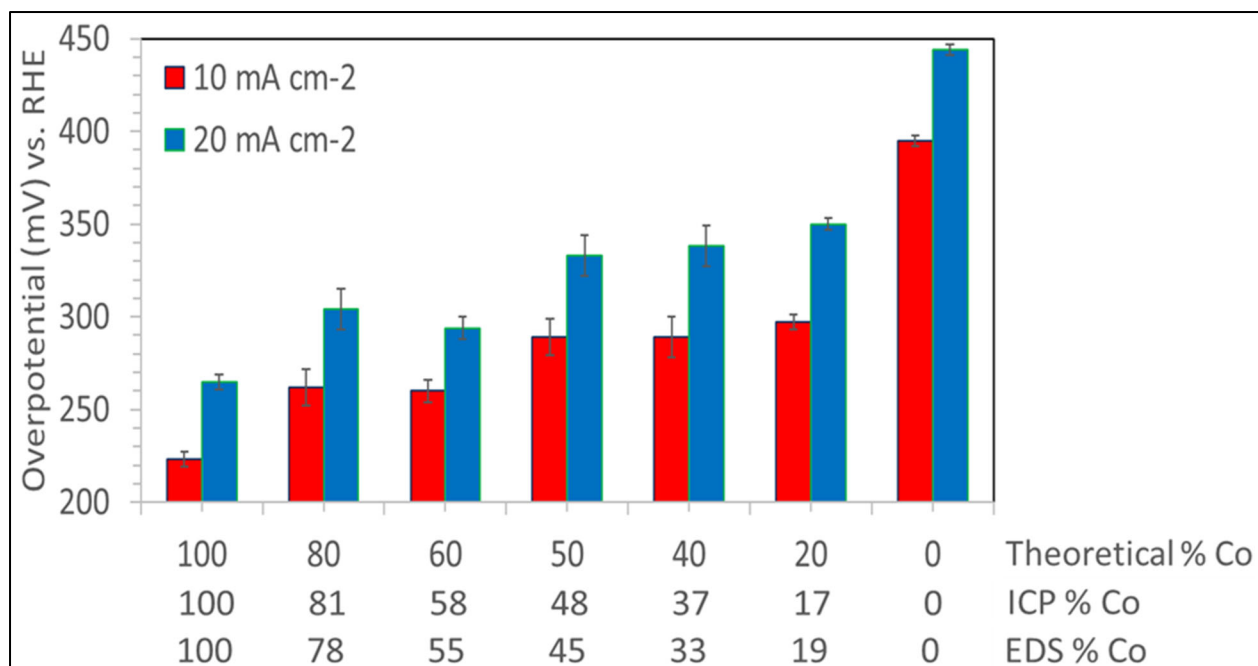

**Figure S12.** Graph of HER overpotentials at 10 mA cm<sup>-2</sup> and 20 mA cm<sup>-2</sup> current densities versus % Co (theoretical, ICP, and EDS).

**Table S8.** Literature comparison table for crystalline and amorphous ternary metal boride OER and HER activity in different electrolytes. All current densities are normalized for the geometric electrode area. The  $\eta_{10}$  overpotentials are calculated versus the ideal equilibrium 0 V and 1.23 V potentials for HER and OER water splitting.

| MB                                                                                                                                                                                                                      | Crystalline/<br>amorphous | Electrode            | OER<br>( $\eta_{10}$ mV)                                          | HER<br>( $\eta_{10}$ mV)                      | Tafel slope<br>(mV/dec)<br>OER/HER                                  | Electrolyte                         | Ref.       |
|-------------------------------------------------------------------------------------------------------------------------------------------------------------------------------------------------------------------------|---------------------------|----------------------|-------------------------------------------------------------------|-----------------------------------------------|---------------------------------------------------------------------|-------------------------------------|------------|
| CoB<br>Co <sub>0.8</sub> Fe <sub>0.2</sub> B<br>Co <sub>0.6</sub> Fe <sub>0.4</sub> B<br>Co <sub>0.5</sub> Fe <sub>0.5</sub> B<br>Co <sub>0.4</sub> Fe <sub>0.6</sub> B<br>Co <sub>0.2</sub> Fe <sub>0.8</sub> B<br>FeB | Cry                       | 50% C <sub>wax</sub> | 345<br>351<br>340<br>338<br>353<br>403<br>456                     | 223<br>262<br>288<br>289<br>289<br>297<br>392 | 95/105<br>66/139<br>79/163<br>103/150<br>87/160<br>78/177<br>52/169 | 1.0 M KOH                           | This study |
| Co <sub>2</sub> MoB <sub>4</sub><br>Fe <sub>2</sub> MoB <sub>4</sub>                                                                                                                                                    | Cry                       | C <sub>cloth</sub>   | 283<br>463                                                        | -                                             | 19.9<br>95.5                                                        | 1.0 M KOH                           | 37         |
| Activated<br>FeCoB <sub>2</sub>                                                                                                                                                                                         | Cry                       | GCE                  | 295                                                               | -                                             | ~84                                                                 | 1.0 M KOH                           | 38         |
| CoFeB<br>CoB<br>FeB                                                                                                                                                                                                     | amor                      | NF                   | 270 ( $\eta_{50}$ )<br>296 ( $\eta_{50}$ )<br>343 ( $\eta_{50}$ ) | -                                             | 36<br>109<br>68                                                     | 1.0 M KOH                           | 39         |
| CoFeB<br>CoB                                                                                                                                                                                                            | Cry                       | GE                   | 328<br>313                                                        | -                                             | 78.9<br>75.7                                                        | 1.0 M KOH                           | 40         |
| NiFe-boride                                                                                                                                                                                                             | amor                      | NF                   | 167                                                               | -                                             | 25                                                                  | 1.0 M KOH                           | 41         |
| Co-Fe-B<br>Co <sub>3</sub> -Fe-B<br>Co-Fe <sub>3</sub> -B<br>CoB<br>FeB                                                                                                                                                 | Cry                       | -                    | 280<br>330<br>360<br>400<br>450                                   | 129<br>194<br>201<br>212<br>267               | 38.9/67.3<br>65.4/94.6<br>66.7/79.5<br>65.9/86.8<br>58.4/99.9       | 1.0 M KOH                           | 42         |
| Fe <sub>3</sub> Co <sub>7</sub> B/CNT<br>Fe <sub>3</sub> Co <sub>7</sub> B<br>CoB/CNT<br>FeB/CNT                                                                                                                        | Amor                      | GC                   | 265<br>282<br>338<br>347                                          | -                                             | 30<br>34<br>73<br>52                                                | 1.0 M KOH                           | 43         |
| AlFe <sub>2</sub> B <sub>2</sub>                                                                                                                                                                                        | Cry                       | NF                   | 240                                                               | -                                             | 42                                                                  | 1.0 M KOH                           | 44         |
| NiCoFeB<br>NiCoB<br>CoB                                                                                                                                                                                                 | Amor                      | GC                   | 284<br>375<br>383                                                 | 345<br>363<br>396                             | 47/98<br>78.1/102<br>79/119                                         | 1.0 M KOH                           | 45         |
| CoNiB/CC                                                                                                                                                                                                                | Amor                      | CC                   | -                                                                 | 80                                            | 88.2                                                                | 1.0 M KOH                           | 46         |
| Co-3MoB                                                                                                                                                                                                                 | Amor                      | GC                   | 96<br>66                                                          | -<br>320                                      | 56<br>155/67                                                        | KPi (pH 7)<br>1.0 M NaOH<br>(pH 14) | 47         |
| Co <sub>2</sub> -Fe-B<br>Co <sub>2</sub> B<br>Fe <sub>2</sub> B                                                                                                                                                         | Amor                      | Cu sheet             | 298<br>340<br>472                                                 | -                                             | 62.6<br>97.3<br>81.6                                                | 1.0 M KOH                           | 48         |

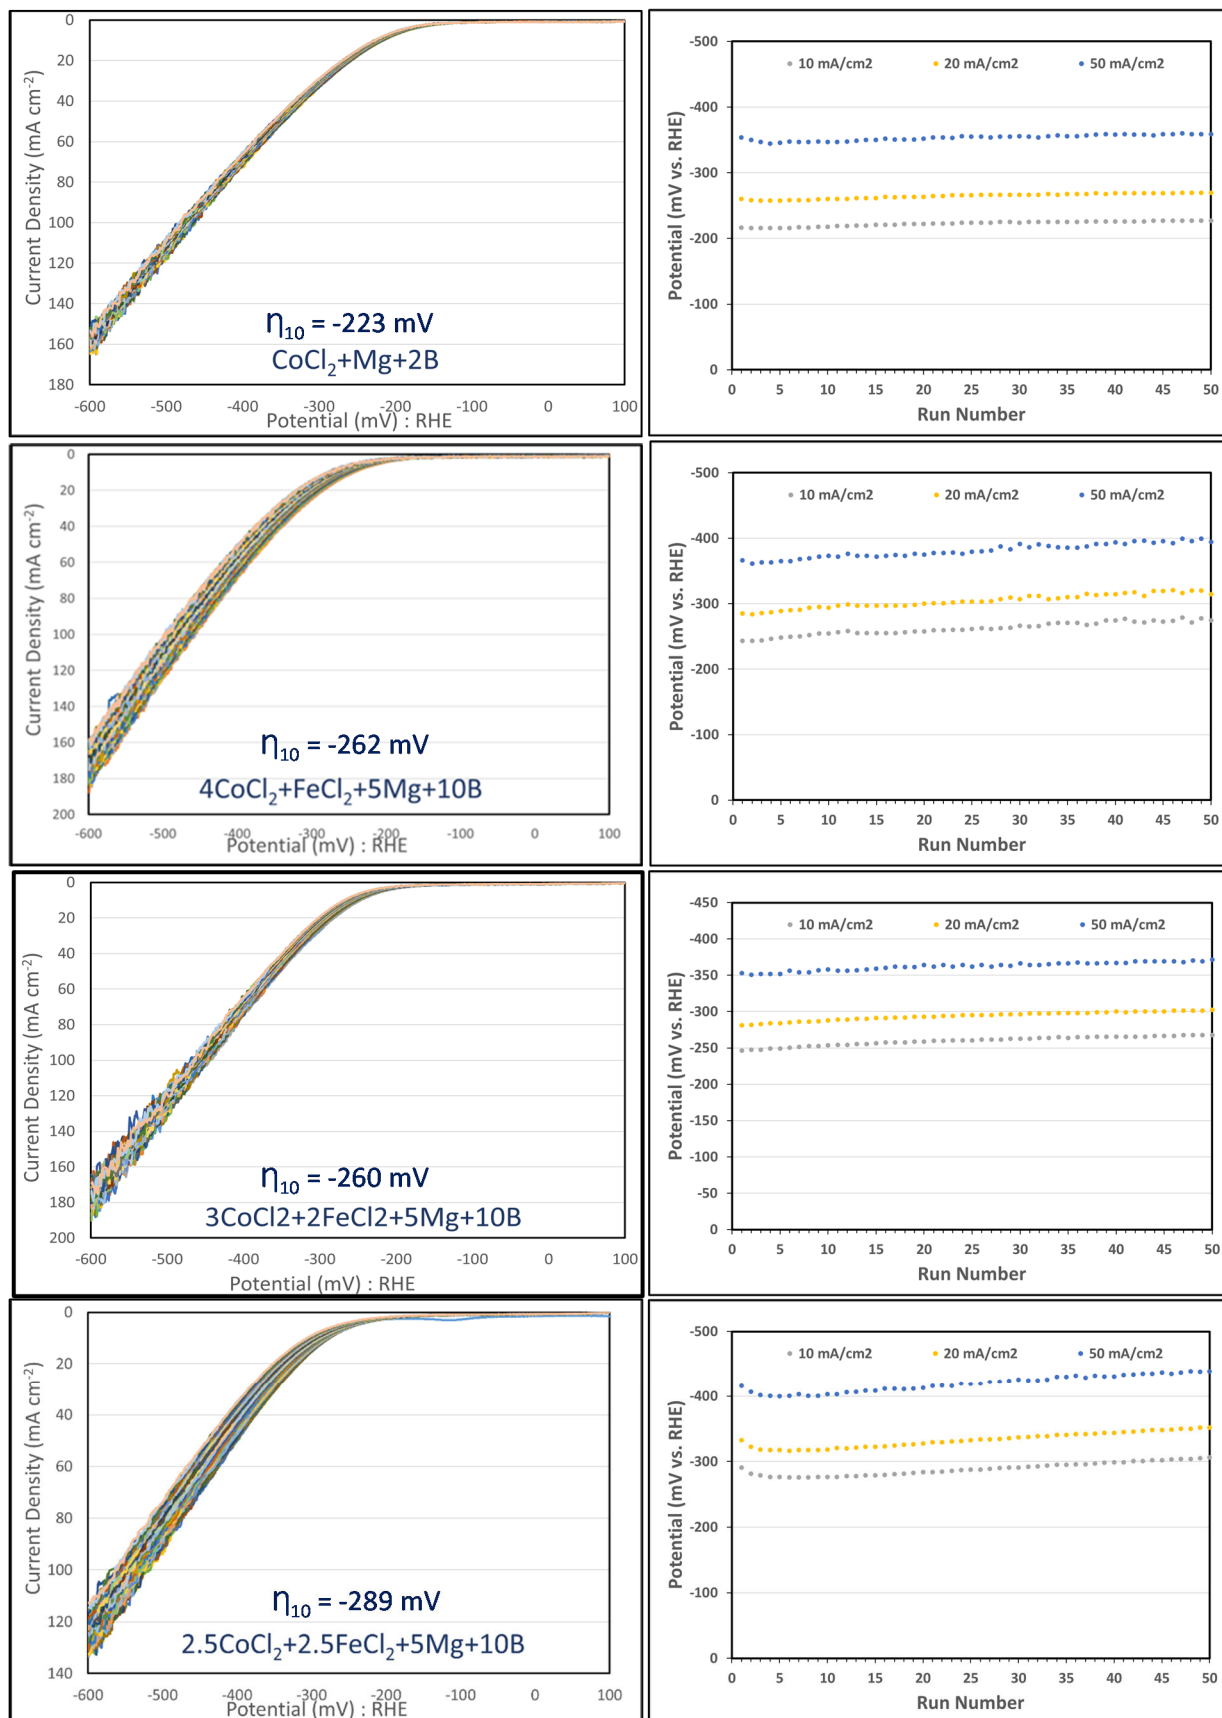

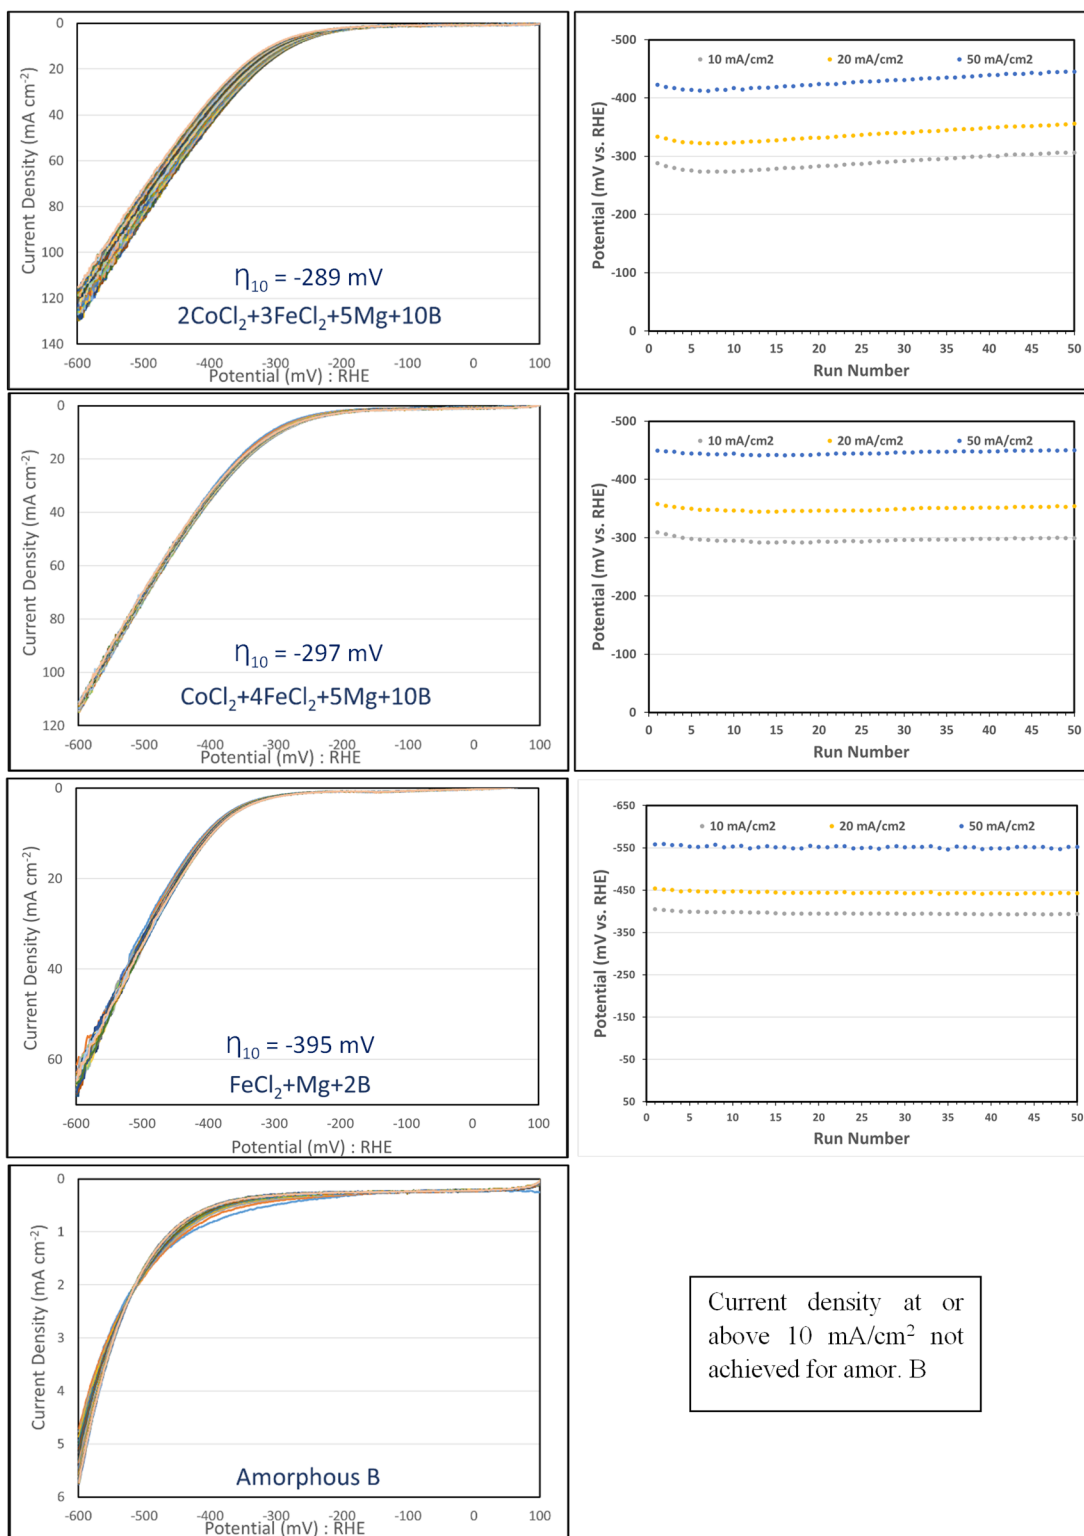

**Figure S13.** Left column: Overlay plots of 50 LSV scans of metal borides for HER in 1.0 M KOH at 5 mV s<sup>-1</sup> scan rate. Right column: Plots of run number versus potentials at 10, 20, and 50 mA/cm<sup>2</sup> current densities extracted from left column overlay plots. Metal boride powders are embedded on C<sub>wax</sub> working electrodes.



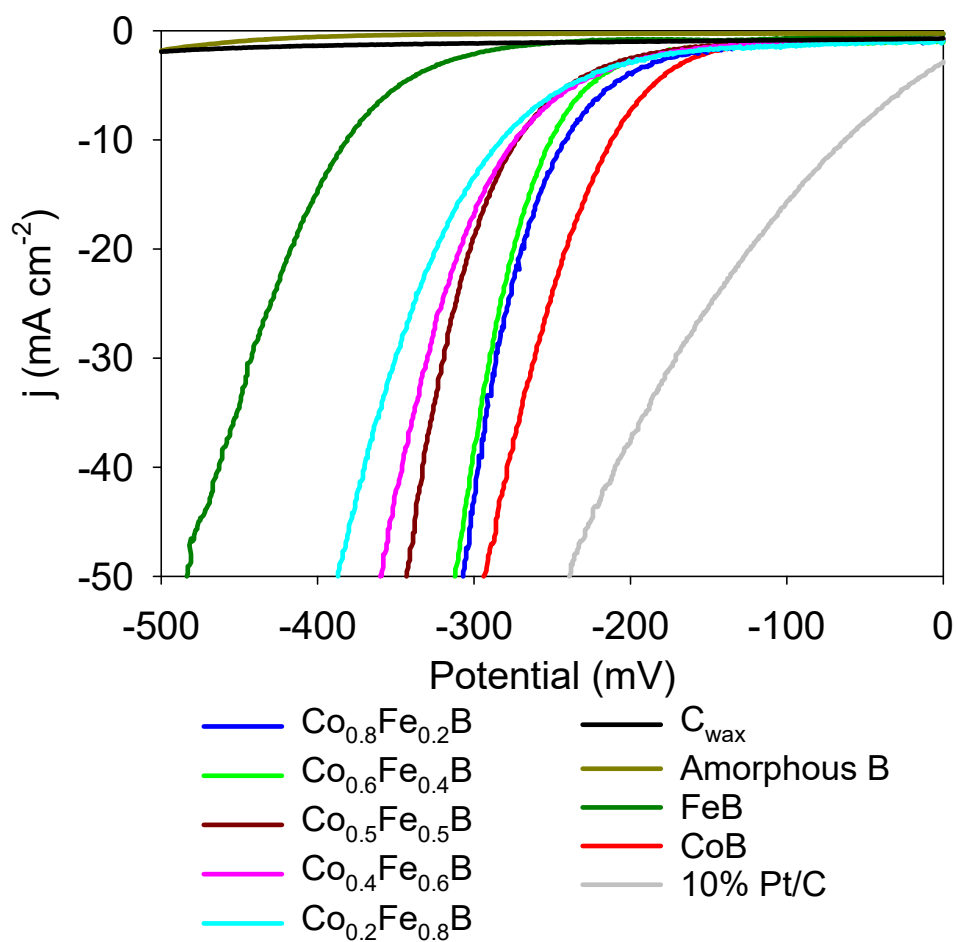

**Figure S14.** HER LSV overlay plots for metal borides with 85% iR compensation at 5 mV s<sup>-1</sup> scan rate. A representative LSV run from 10 LSVs with iR on is shown in the graph. The working electrodes are metal boride powders embedded on C<sub>wax</sub> tips.

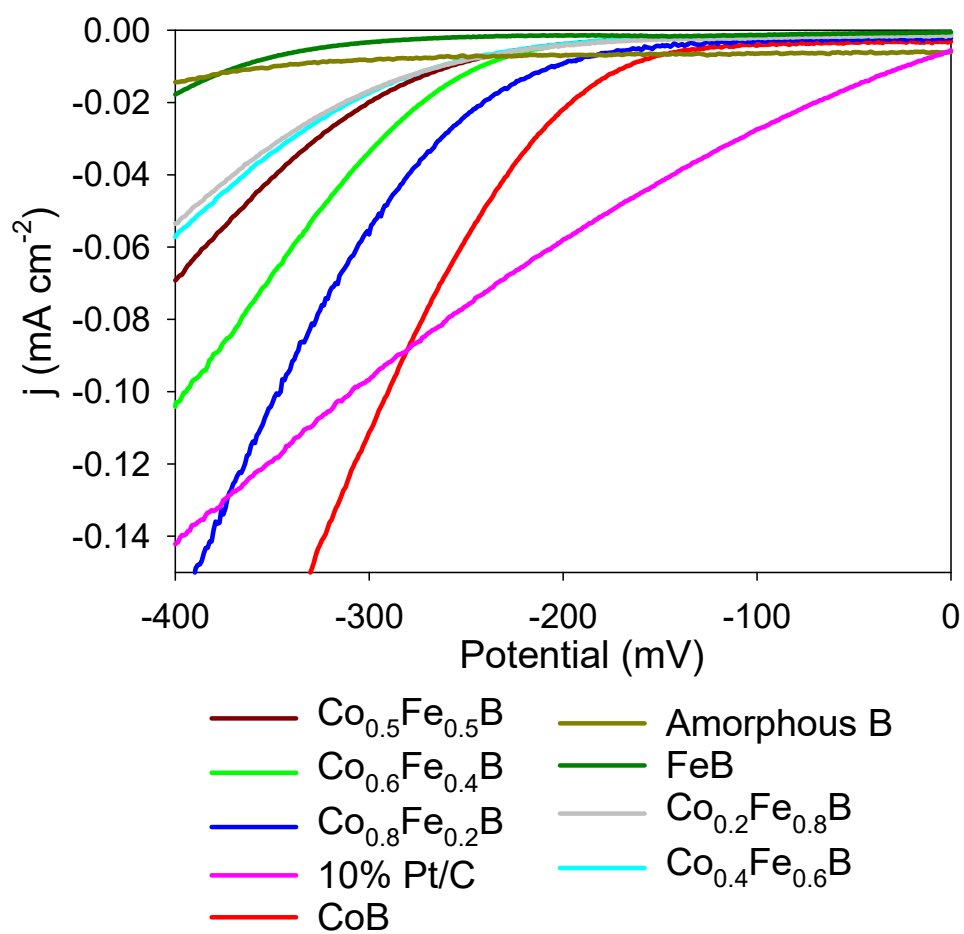

**Figure S15.** HER LSV overlay plots for metal borides and 10% Pt/C with ECSA normalized current densities in 1.0 M KOH.

**Table S9.** HER electrocatalysis of CoB + FeB physical mixing samples in 1.0 M KOH (average of 50 HERs were reported in the table).

| Sample            | $(\eta_{10})$ (mV) <sup>1</sup> | $(\eta_{20})$ (mV) | Tafel (mV dec <sup>-1</sup> ) | ECSA (cm <sup>2</sup> ) |
|-------------------|---------------------------------|--------------------|-------------------------------|-------------------------|
| CoB               | -223 ± 4                        | -265 ± 4           | -105                          | 22                      |
| 4 CoB + FeB       | -293 ± 1                        | -355 ± 1           | -121                          | 23                      |
| 3 CoB + 2 FeB     | -298 ± 1                        | -356 ± 2           | -139                          | 29                      |
| 2.5 CoB + 2.5 FeB | -305 ± 1                        | -372 ± 2           | -148                          | 54                      |
| 2 CoB + 3 FeB     | -313 ± 2                        | -378 ± 2           | -153                          | 35                      |
| CoB + 4 FeB       | -364 ± 5                        | -430 ± 6           | -155                          | 31                      |
| FeB               | -395 ± 3                        | -444 ± 3           | -136                          | 43                      |

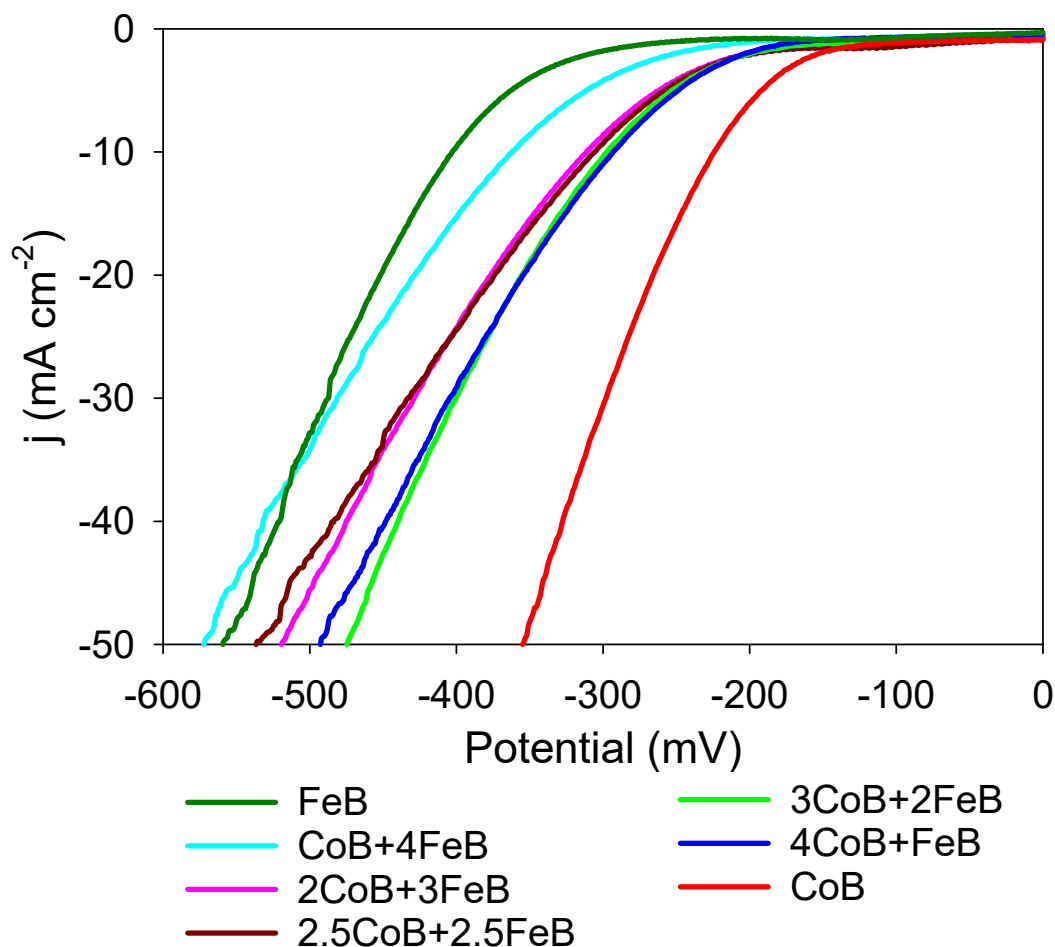

**Figure S16.** Representative HER LSV results of physically mixed (hand-grinding in a mortar and pestle) CoB + FeB mixtures. Data was obtained using 1.0 M KOH in a three-electrode cell at 5 mV/s scan rate with Hg/HgO reference and graphite rod counter electrodes. Current densities are scaled using the geometric electrode area (0.08 cm<sup>2</sup>).

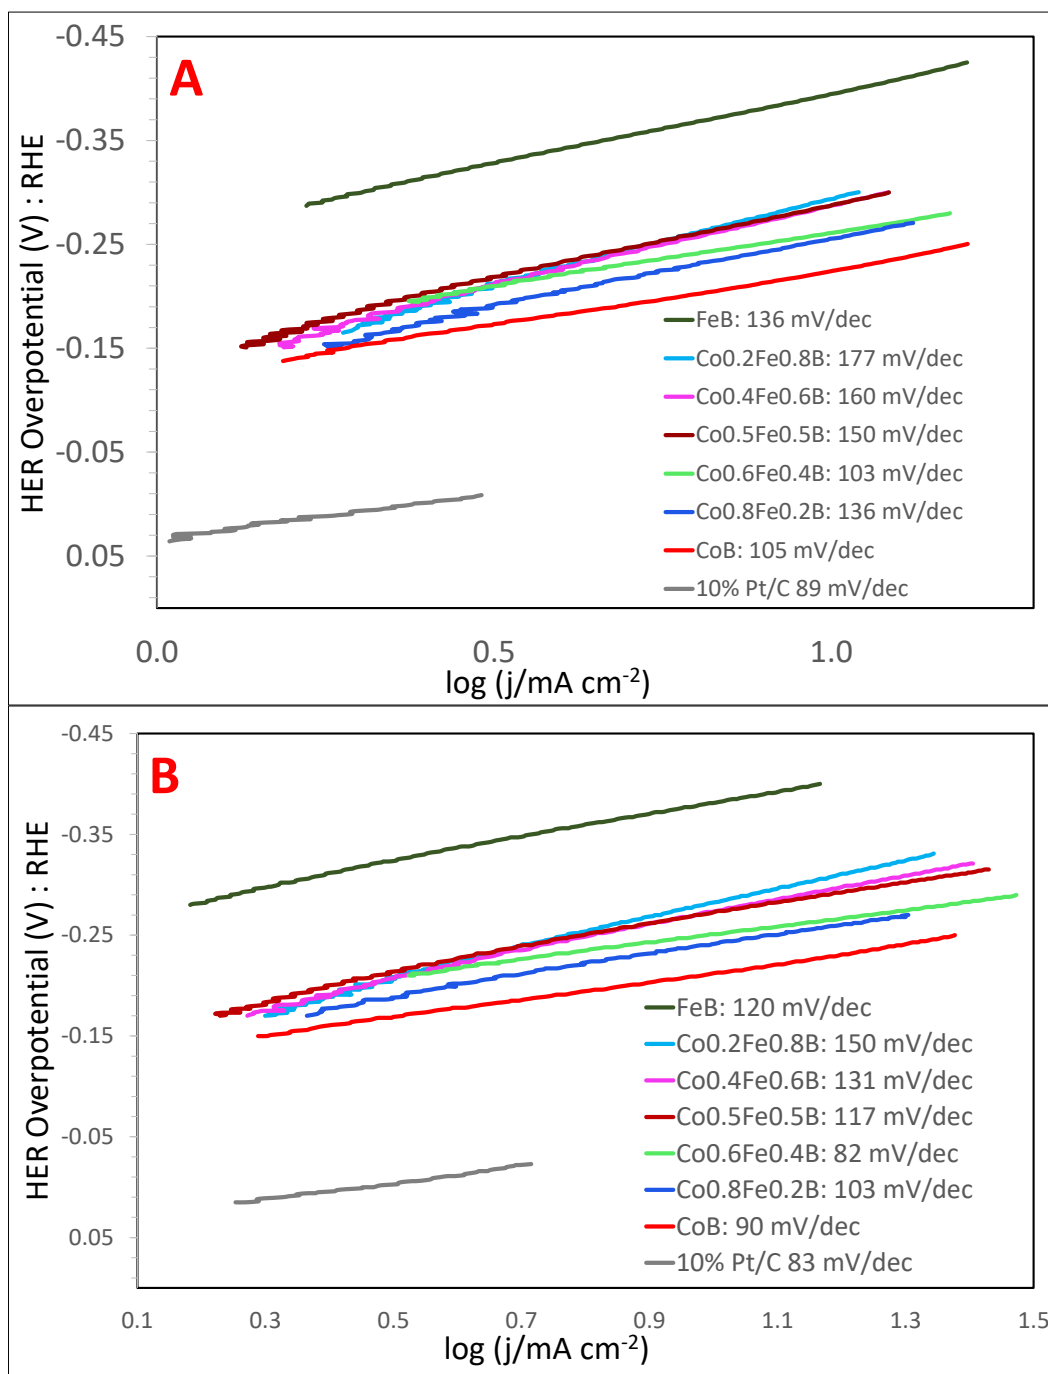

**Figure S17.** The Tafel slopes of metal borides and 10% Pt/C representative HER LSV runs in 1.0 M KOH. **A.** without iR correction, **B.** with 85% iR correction.

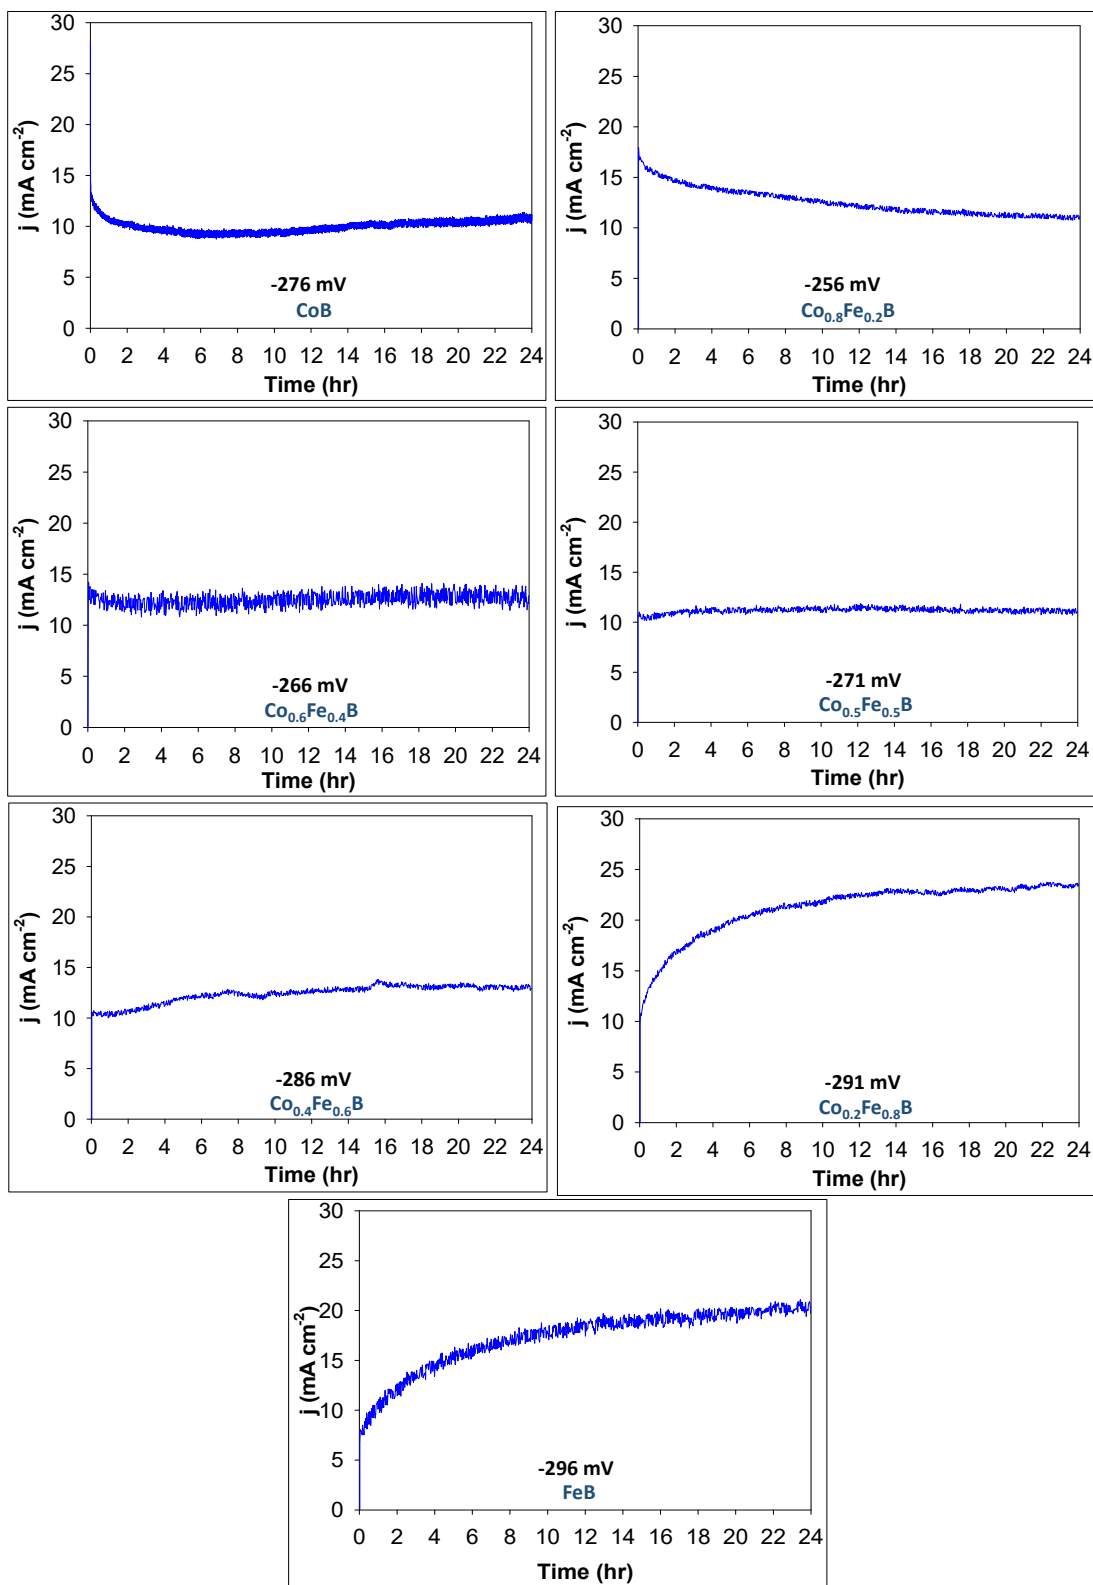

**Figure S18.** Applied negative potential HER chronoamperometry data (current versus time at constant potential) for metal borides in 1.0 M KOH for 24 hrs. The potentials used are indicated and were chosen to ideally sustain  $10 \text{ mA cm}^{-2}$ . The working electrodes are metal boride powders embedded on  $C_{\text{wax}}$  tips.

**Table S10.** Summary of post-chronoamperometry HER electrocatalysis of SSM synthesized metal borides in 1.0 M KOH (average of 10 HERs were reported in the table) (manually corrected 85% iR compensation results in parentheses).

| Sample                                | ( $\eta_{10}$ ) (mV) <sup>1</sup> | ( $\eta_{20}$ ) (mV)     | Tafel (mV dec <sup>-1</sup> ) |
|---------------------------------------|-----------------------------------|--------------------------|-------------------------------|
| CoB                                   | -255 ± 2<br>(-240 ± 2)            | -303 ± 2<br>(-273 ± 2)   | -121<br>(-103)                |
| Co <sub>0.8</sub> Fe <sub>0.2</sub> B | -230 ± 6<br>(-217 ± 6)            | -279 ± 4<br>(-252 ± 4)   | -134<br>(-110)                |
| Co <sub>0.6</sub> Fe <sub>0.4</sub> B | -264 ± 5<br>(-254 ± 5)            | -303 ± 4<br>(-282 ± 4)   | -119<br>(-100)                |
| Co <sub>0.5</sub> Fe <sub>0.5</sub> B | -287 ± 10<br>(-266 ± 10)          | -343 ± 10<br>(-299 ± 10) | -162<br>(-138)                |
| Co <sub>0.4</sub> Fe <sub>0.6</sub> B | -267 ± 8<br>(-237 ± 8)            | -326 ± 8<br>(-266 ± 8)   | -161<br>(-130)                |
| Co <sub>0.2</sub> Fe <sub>0.8</sub> B | -275 ± 3<br>(-257 ± 3)            | -335 ± 3<br>(-298 ± 3)   | -170<br>(-146)                |
| FeB                                   | -324 ± 10<br>(-306 ± 10)          | -382 ± 9<br>(-346 ± 9)   | -169<br>(-149)                |

Before

After

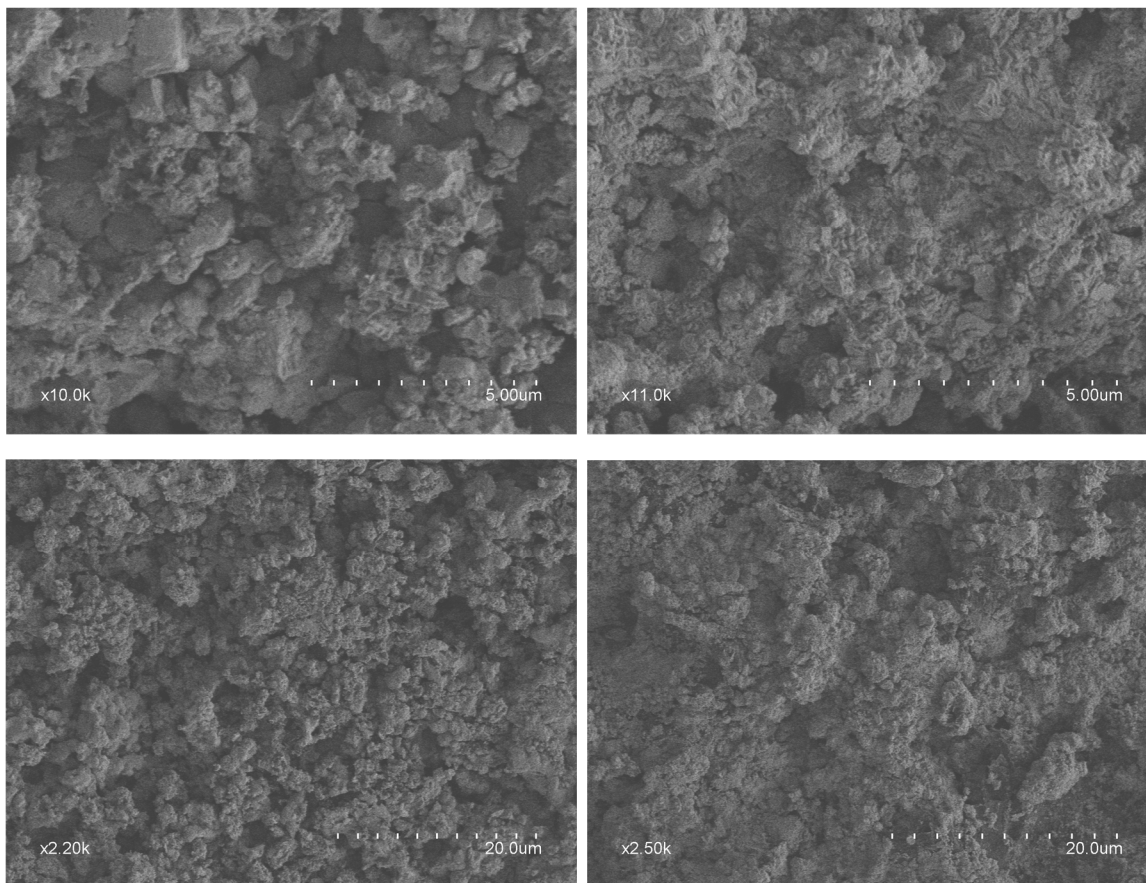

**Figure S19.** SEM surface comparison of FeB electrodes before (left) and after (right) HER electrochemistry measurements. Top two images are high-magnification (5 μm) and bottom two images are low-magnification (20 μm) images.

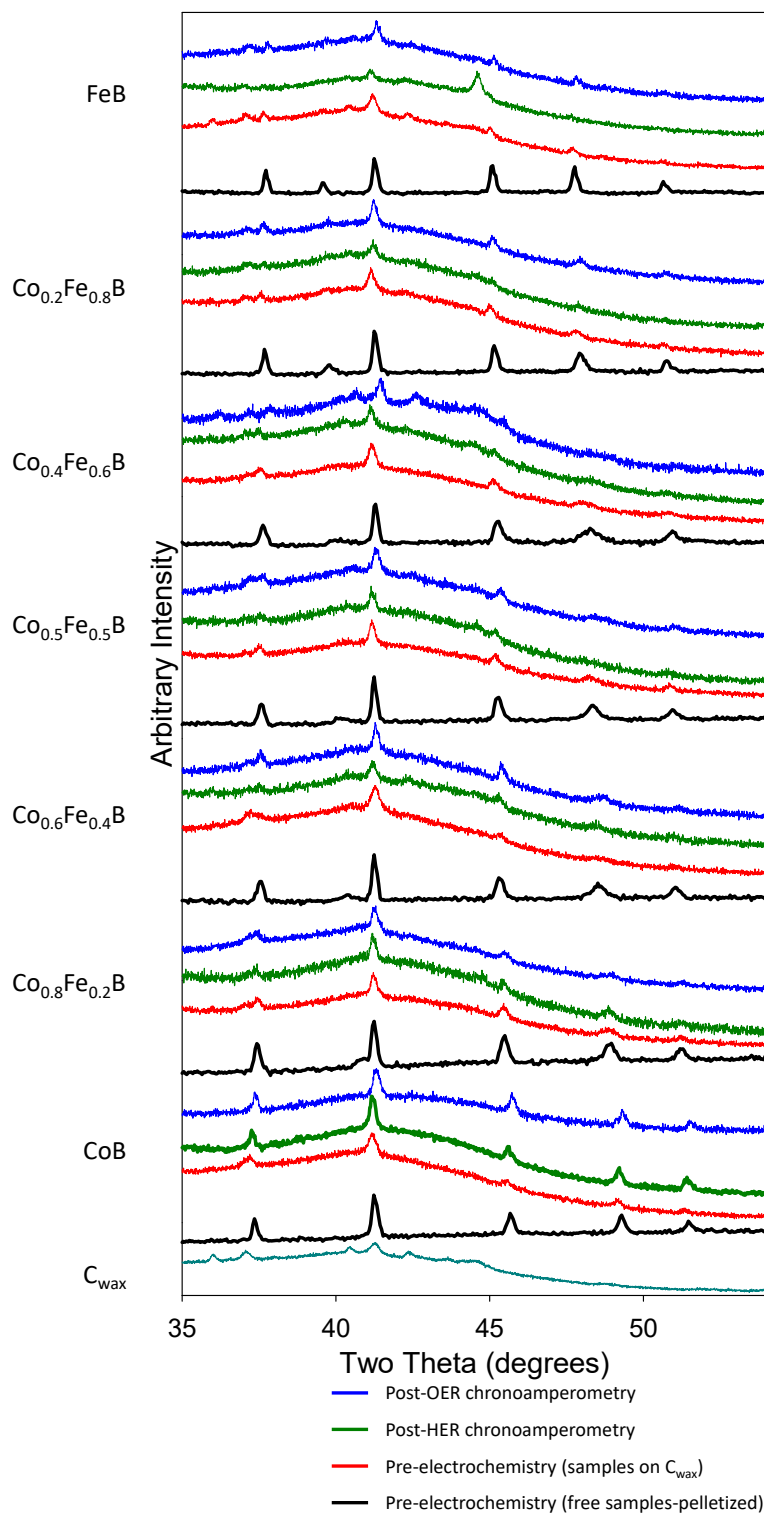

**Figure S20.** Powder XRD results of pre- and post-positive potential OER chronoamperometry (red and blue diffractograms) and post-negative potential HER chronoamperometry (green diffractograms) of powders on  $C_{wax}$  tips for CoB, FeB, and  $Co_{1-x}Fe_xB$  solid-solutions. Metal borides pelletized free sample XRDs (black diffractograms), and diffractogram of  $C_{wax}$  are also shown for the comparison. The  $C_{wax}$  electrode has several broad XRD peaks that are a combination of graphite and paraffin wax diffraction.



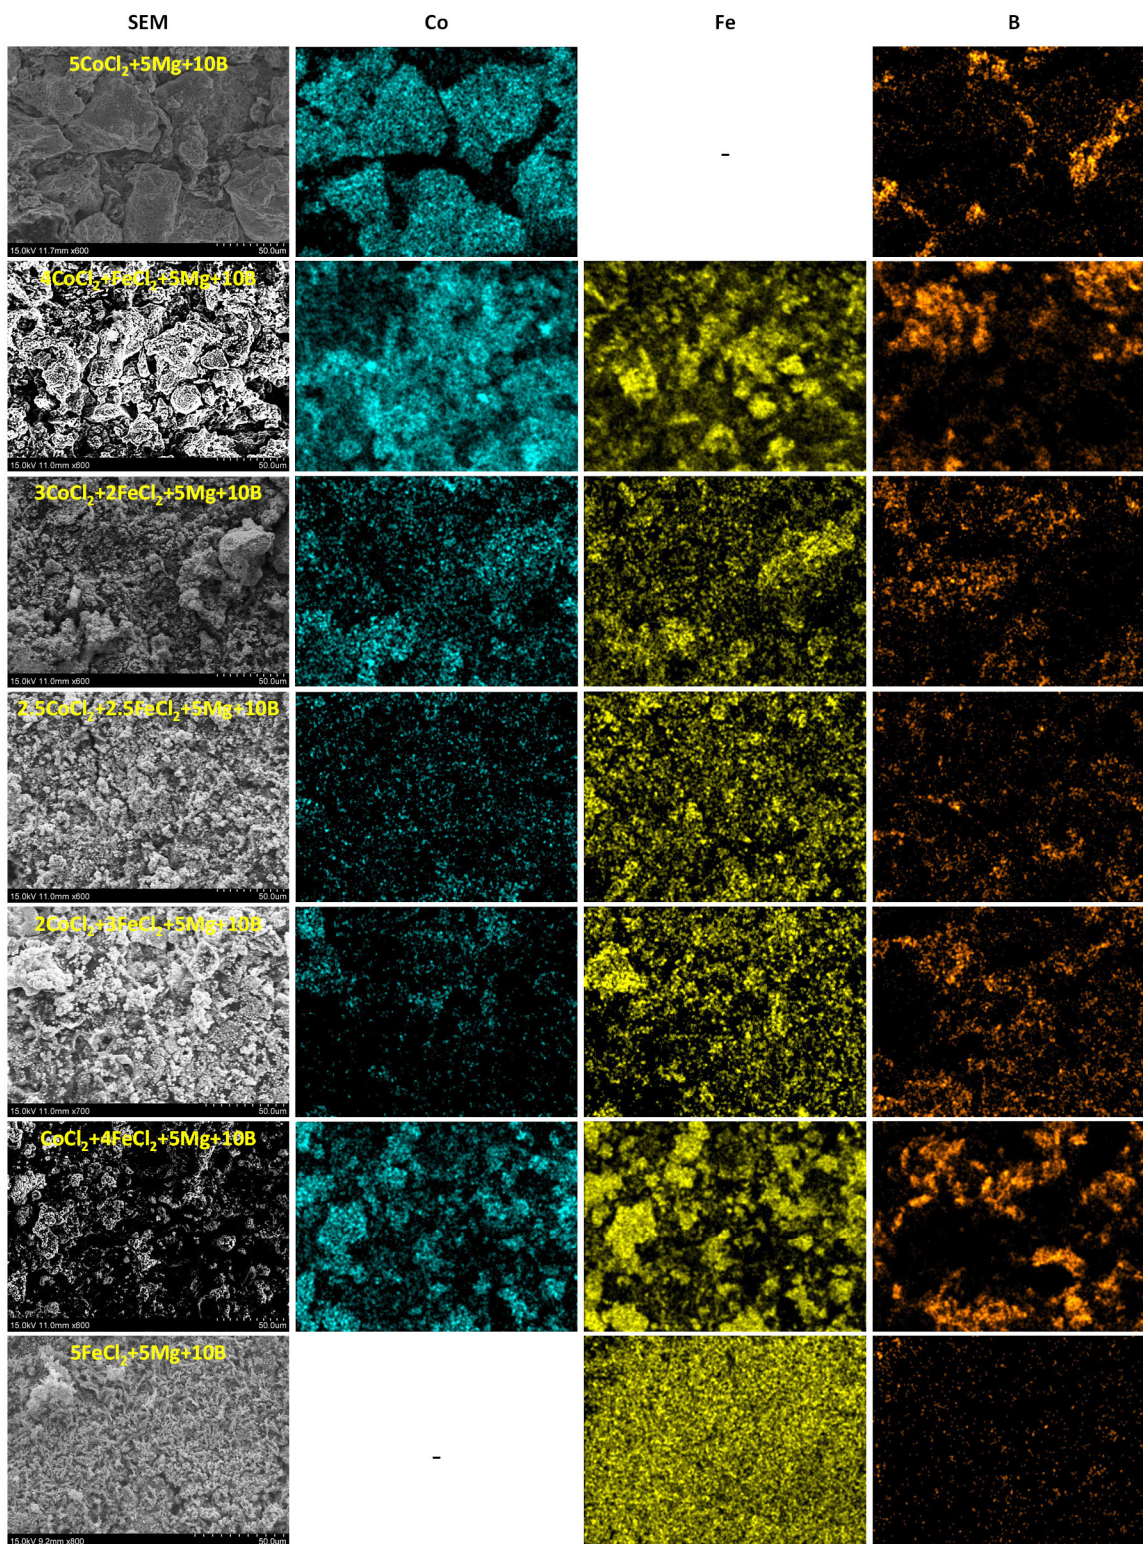

**Figure S21.** Post-negative potential HER chronoamperometry EDS maps of CoB, FeB, and Co<sub>1-x</sub>Fe<sub>x</sub>B solid-solutions. Images are from powders embedded on C<sub>wax</sub> tip.

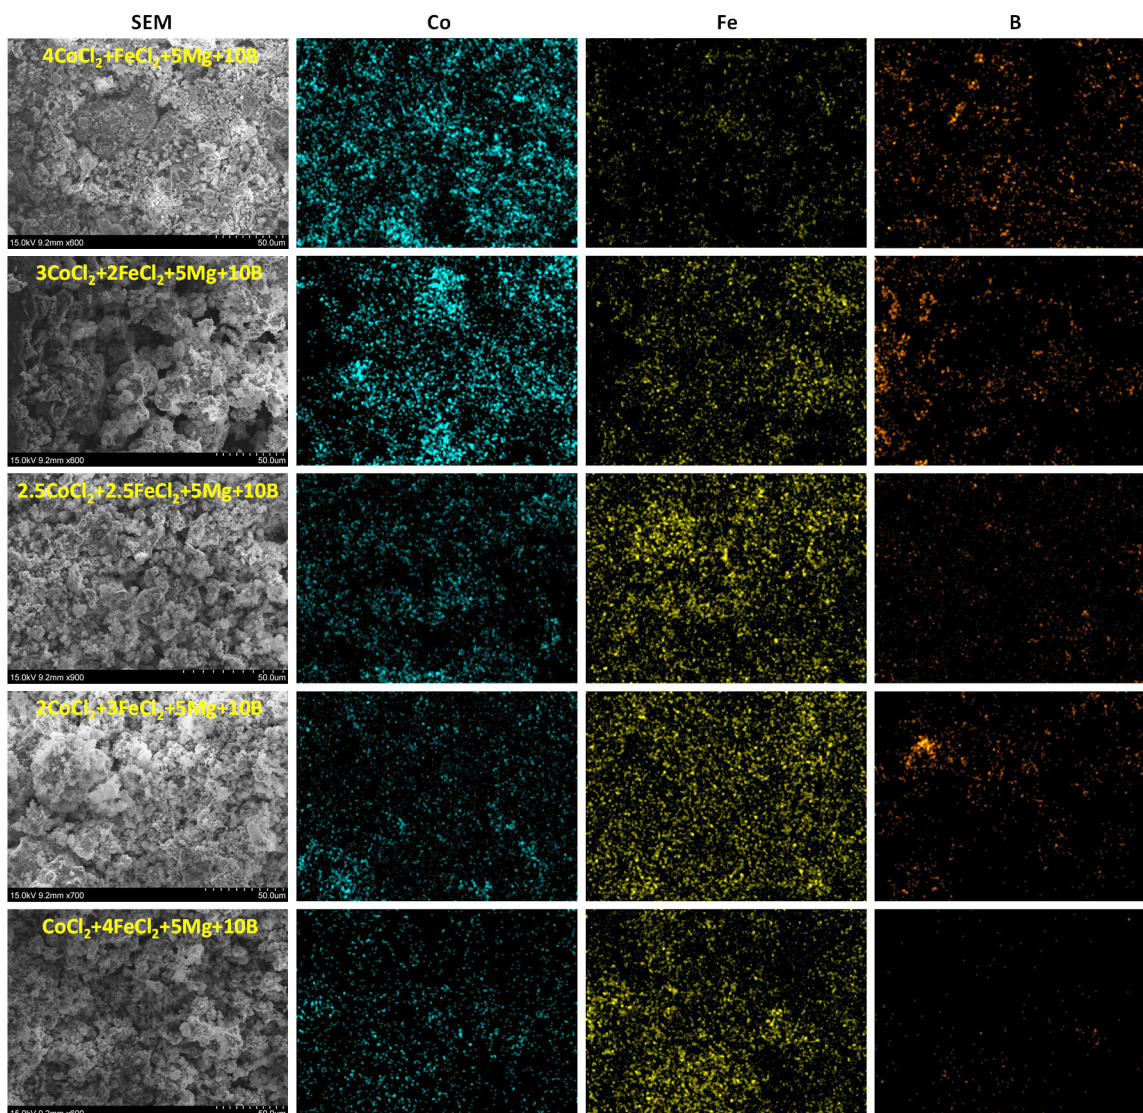

**Figure S22.** EDS maps of CoB, FeB, and  $\text{Co}_{1-x}\text{Fe}_x\text{B}$  solid-solutions on  $\text{C}_{\text{wax}}$  tips before electrochemistry measurements (pre-electrochemistry). Images are from powders embedded on  $\text{C}_{\text{wax}}$  tip.

**Table S11.** EDS Co/Fe ratios of  $\text{Co}_{1-x}\text{Fe}_x\text{B}$  solid-solutions before and after electrochemistry measurements.

| <b>Sample</b>                                  | <b>Before electrochemistry (free powder pelletized)</b> | <b>Before electrochemistry (on <math>C_{\text{wax}}</math>)</b> | <b>After electrochemistry (HER)</b> | <b>After electrochemistry (OER)</b> |
|------------------------------------------------|---------------------------------------------------------|-----------------------------------------------------------------|-------------------------------------|-------------------------------------|
|                                                | <b>Co/Fe ratio</b>                                      | <b>Co/Fe ratio</b>                                              | <b>Co/Fe ratio</b>                  | <b>Co/Fe ratio</b>                  |
| <b>4CoCl<sub>2</sub>+FeCl<sub>2</sub></b>      | 78/22                                                   | 78/22                                                           | 62/38                               | 78/22                               |
| <b>3CoCl<sub>2</sub>+2FeCl<sub>2</sub></b>     | 55/45                                                   | 57/43                                                           | 57/43                               | 63/37                               |
| <b>2.5CoCl<sub>2</sub>+2.5FeCl<sub>2</sub></b> | 45/55                                                   | 50/50                                                           | 32/68                               | 51/49                               |
| <b>2CoCl<sub>2</sub>+3FeCl<sub>2</sub></b>     | 33/67                                                   | 34/66                                                           | 23/77                               | 36/64                               |
| <b>CoCl<sub>2</sub>+4FeCl<sub>2</sub></b>      | 19/81                                                   | 19/81                                                           | 16/84                               | 23/77                               |

EDS of fresh metal borides as pelletized free powder form or pressed and embedded on  $C_{\text{wax}}$  electrode tips were used as before electrochemistry EDS samples. EDS of metal borides on  $C_{\text{wax}}$  after electrochemistry was obtained after initial 50 HERs or 56 OERs, 24-hour chronoamperometry run, and post 10 LSV runs.

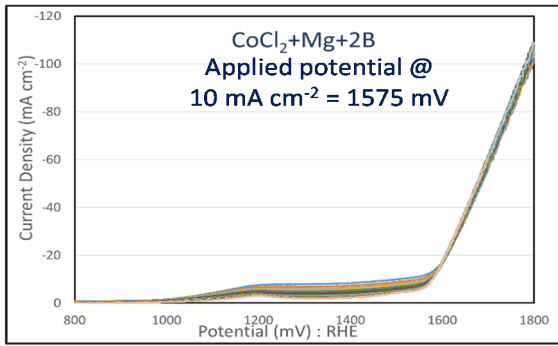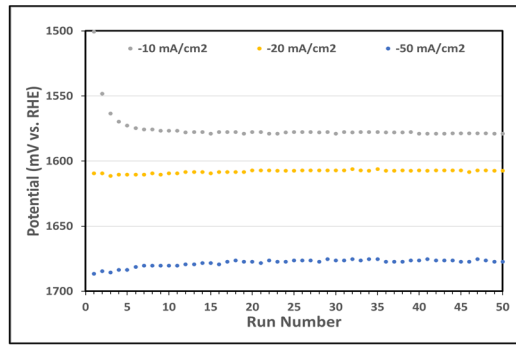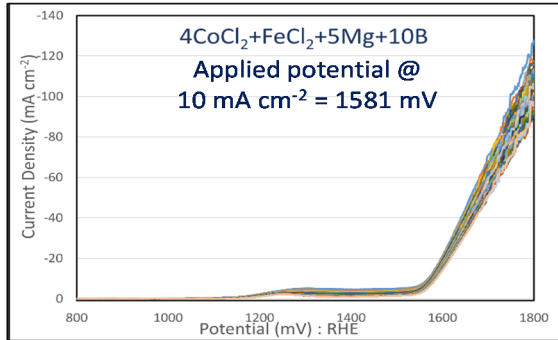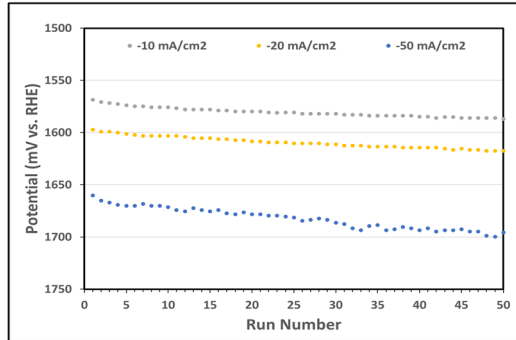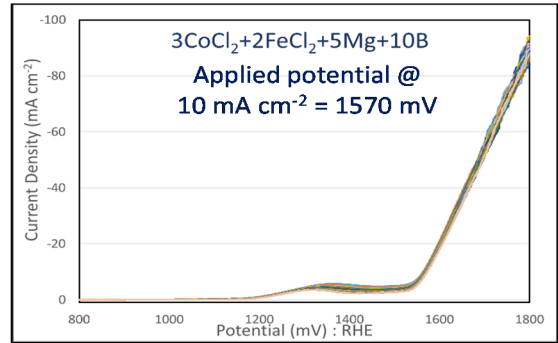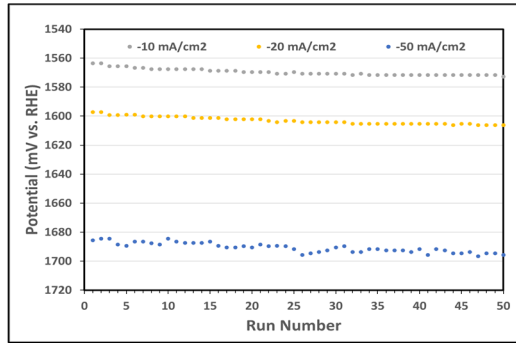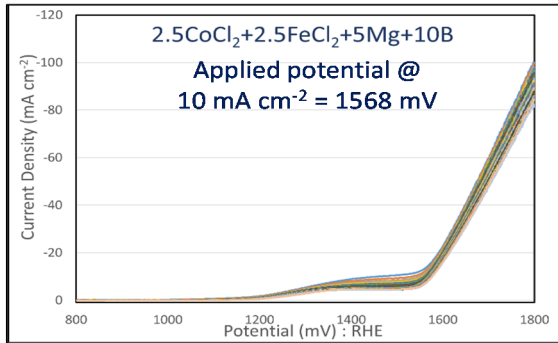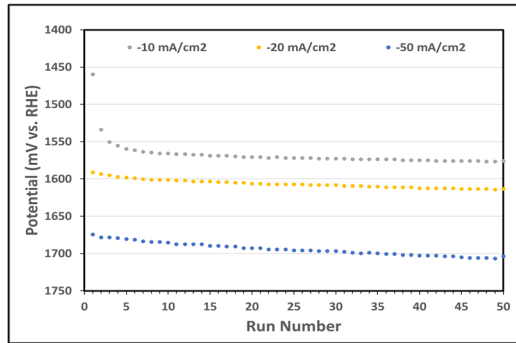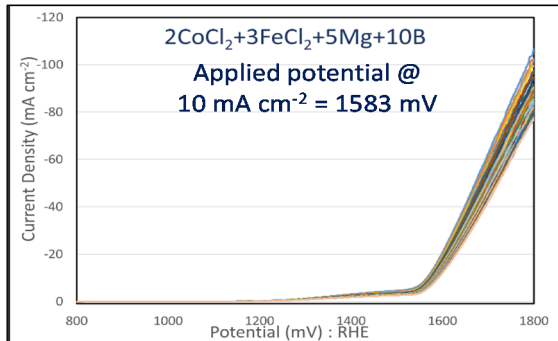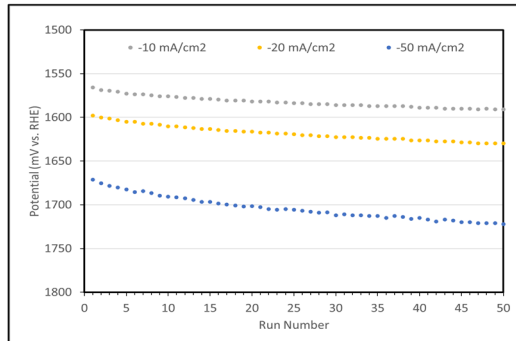

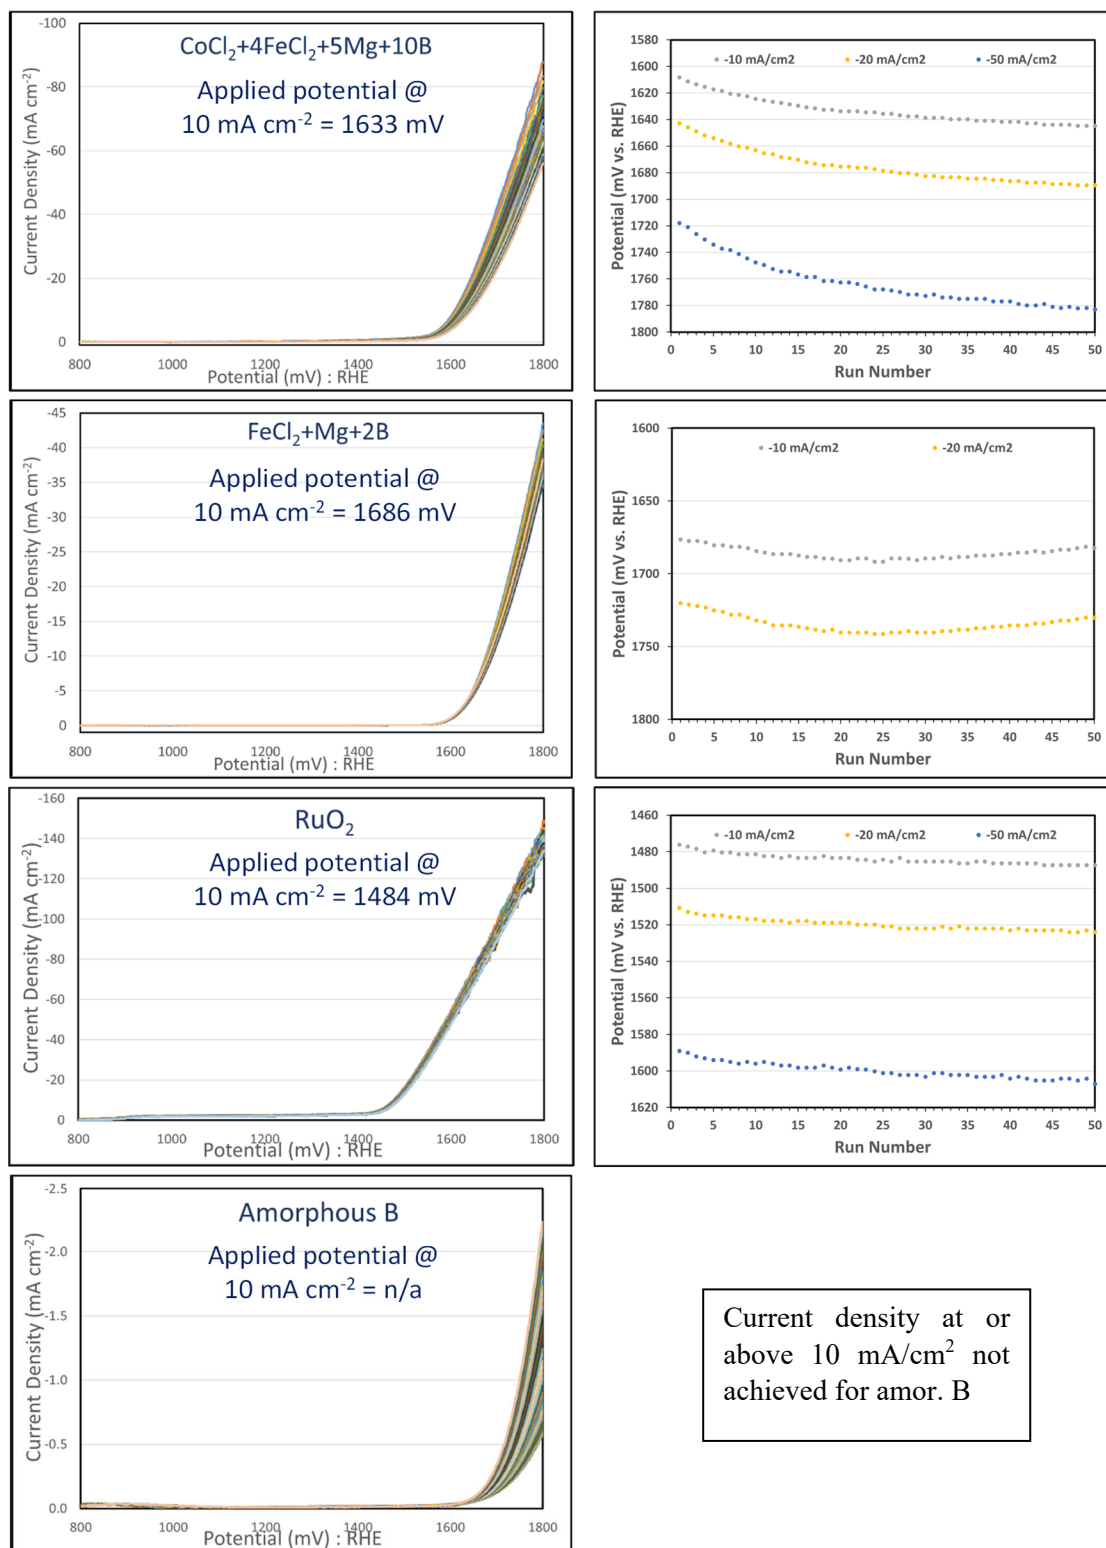

**Figure S23.** Left column: Overlay plots of 50 LSV runs of CoB, FeB,  $\text{Co}_{1-x}\text{Fe}_x\text{B}$ ,  $\text{RuO}_2$ , and B for OER experiments in 1.0 M KOH at  $5 \text{ mV s}^{-1}$  scan rate. Right column: Plots of run number versus potentials at 10, 20 and 50  $\text{mA/cm}^2$  current densities extracted from left column overlay plots. The working electrodes are metal boride powders embedded on  $\text{C}_{\text{wax}}$  tips.

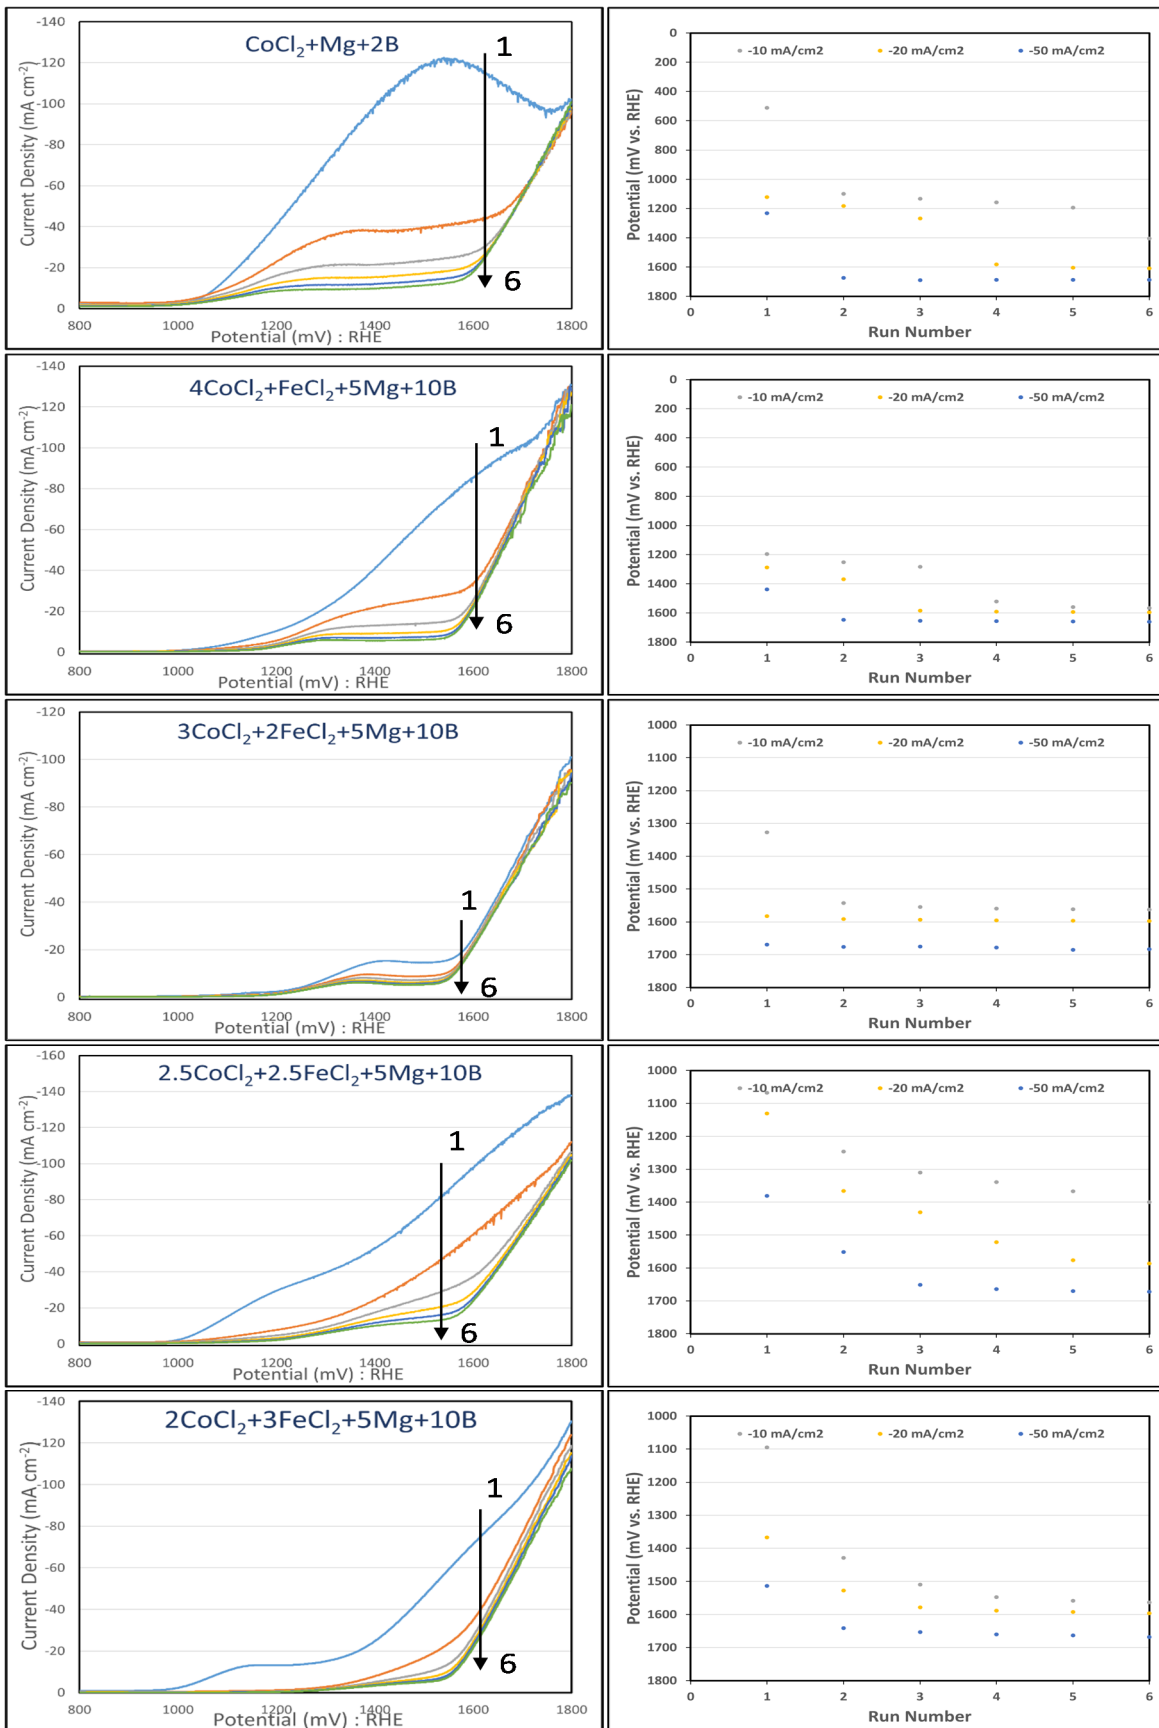

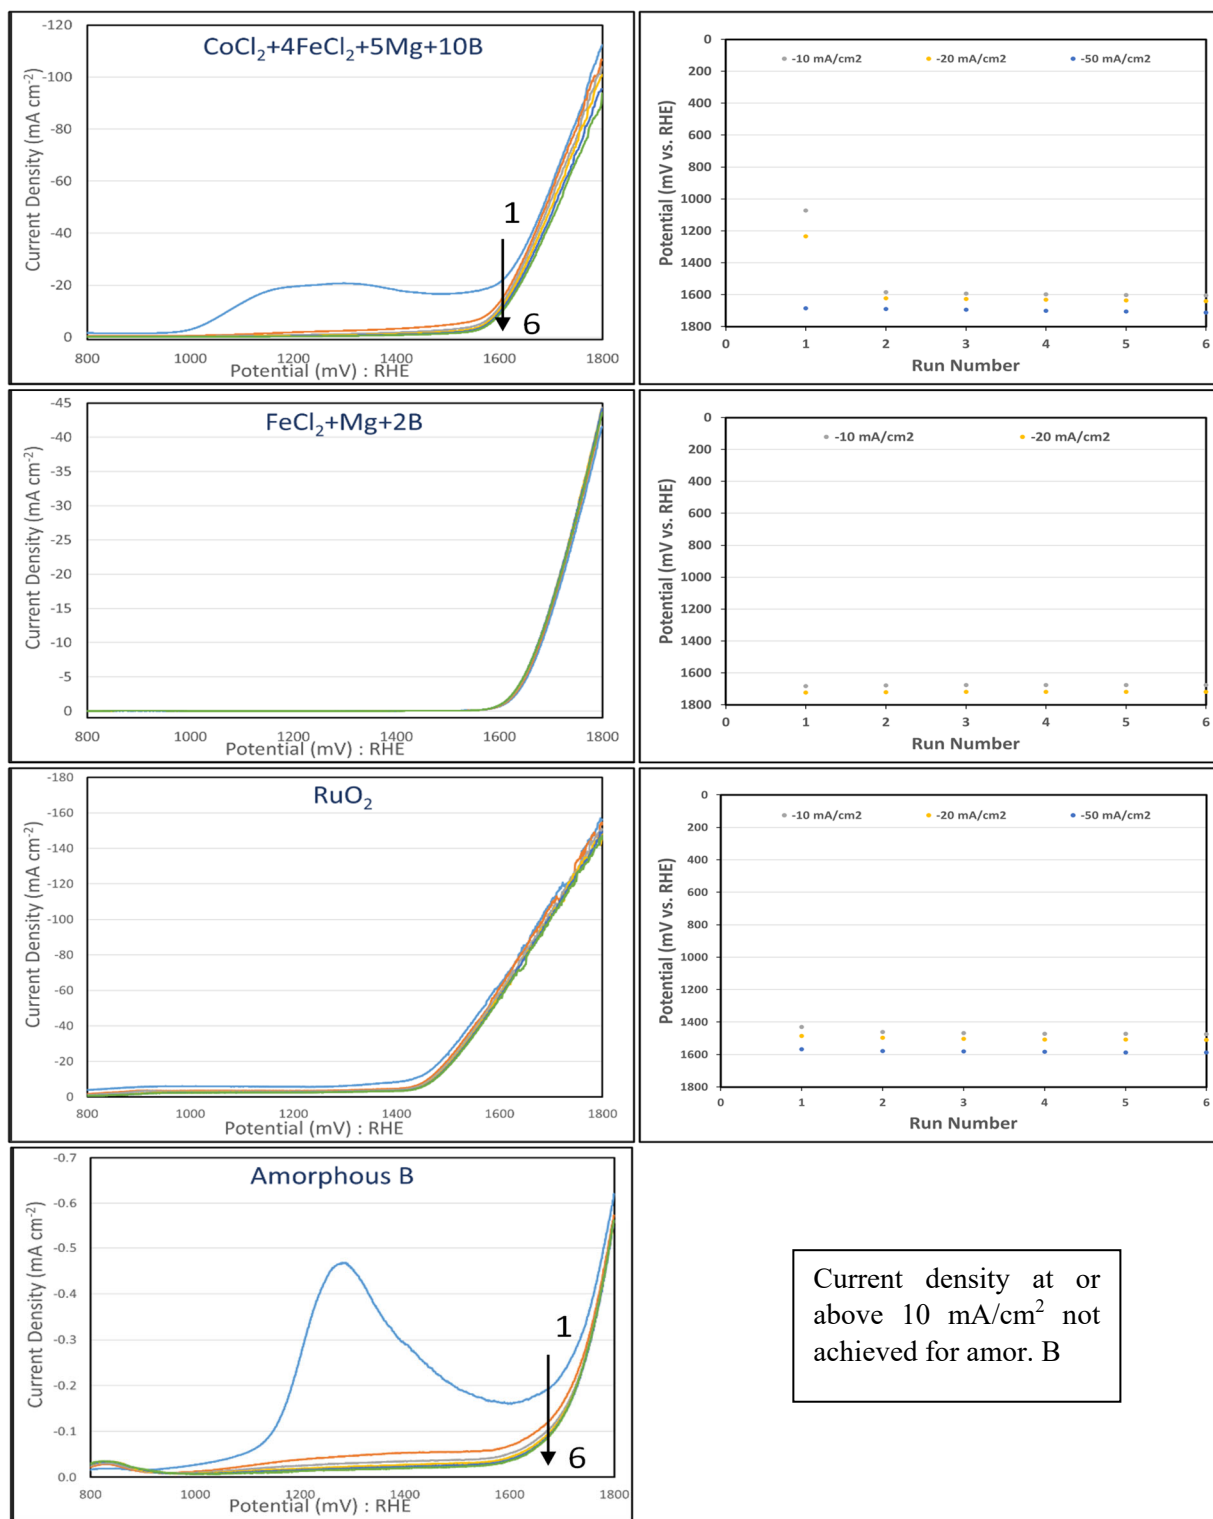

**Figure S24.** First six OER conditioning runs overlay plots and their corresponding potential versus run number plots in 1.0 M KOH at  $5 \text{ mV s}^{-1}$  scan rate. The working electrodes are metal boride powders embedded on  $\text{C}_{\text{wax}}$  tips. It is obvious that  $\text{CoB}$  and  $\text{Co}_{1-x}\text{Fe}_x\text{B}$  solid solutions' OER active stable surfaces formed after surface modifications of conditioning runs. LSV curves moved from run 1 to run 6 as represented by the arrow.

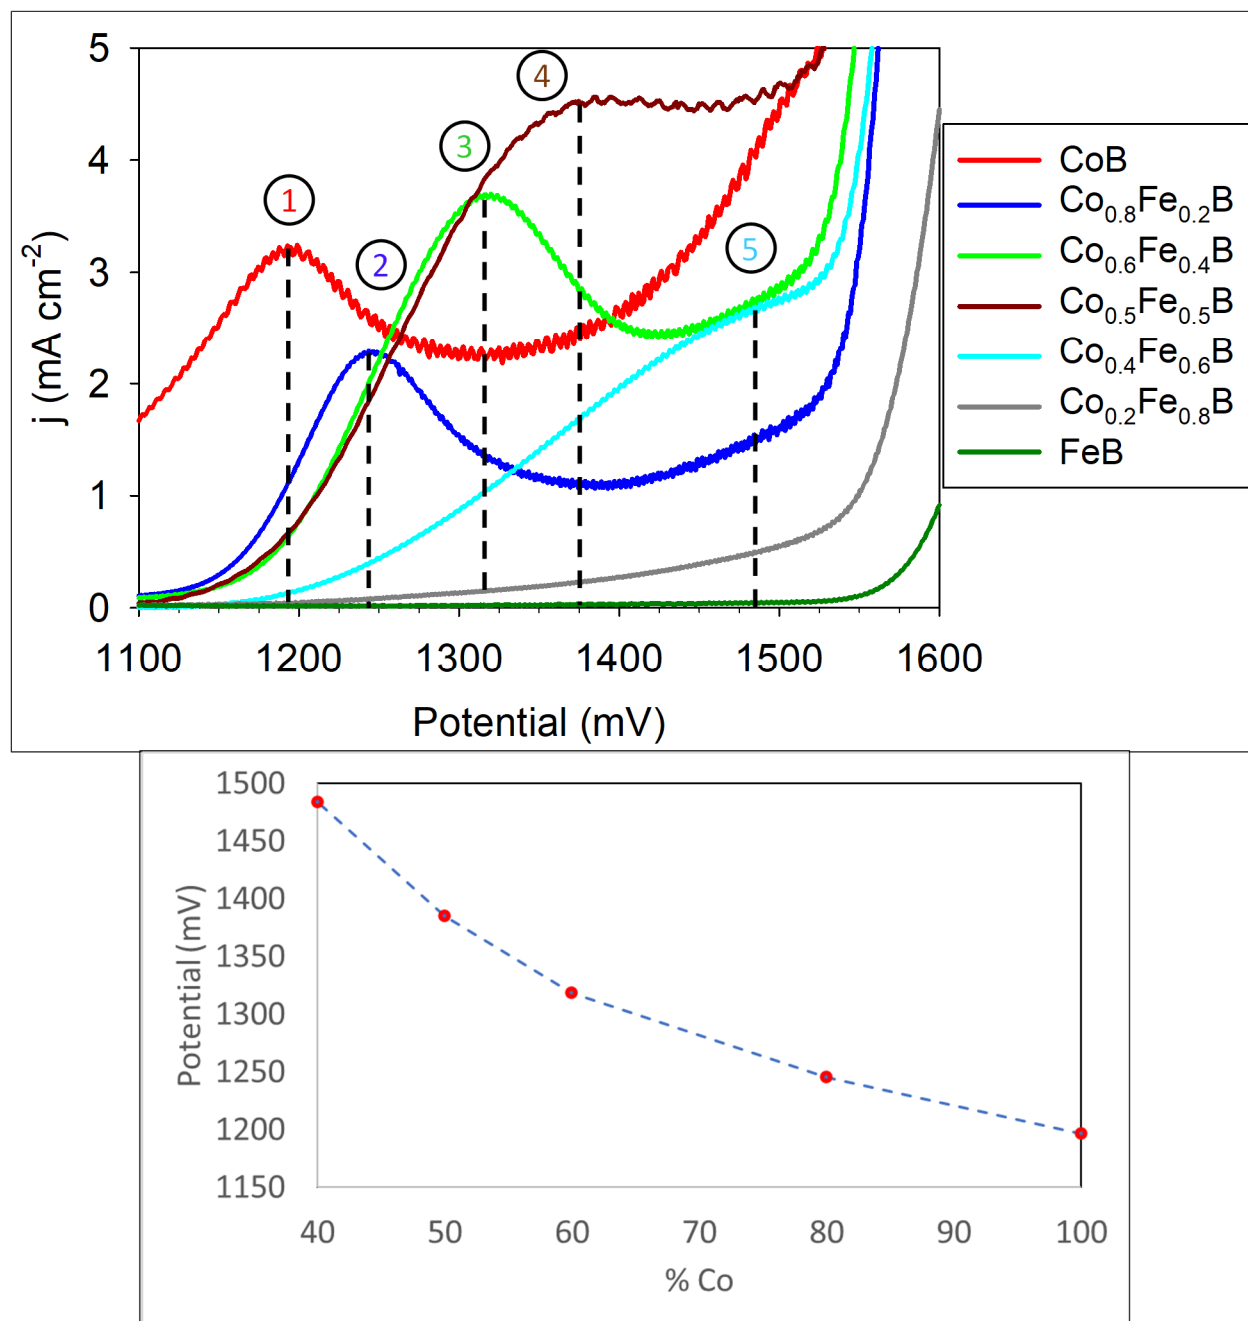

**Figure S25.** Top: Additional oxidation peak in CoB and Co<sub>1-x</sub>Fe<sub>x</sub>B samples formed around 1200-1500 mV potential range. Representative (25<sup>th</sup> run) data were obtained for the comparison. Peaks positions at 1196 mV (1), 1245 mV (2), 1318 mV (3), 1385 mV (4), and 1492 mV (5) for CoB, Co<sub>0.8</sub>Fe<sub>0.2</sub>B, Co<sub>0.6</sub>Fe<sub>0.4</sub>B, Co<sub>0.5</sub>Fe<sub>0.5</sub>B, Co<sub>0.4</sub>Fe<sub>0.6</sub>B samples, respectively. Bottom: Graph of %Co versus peak potentials.



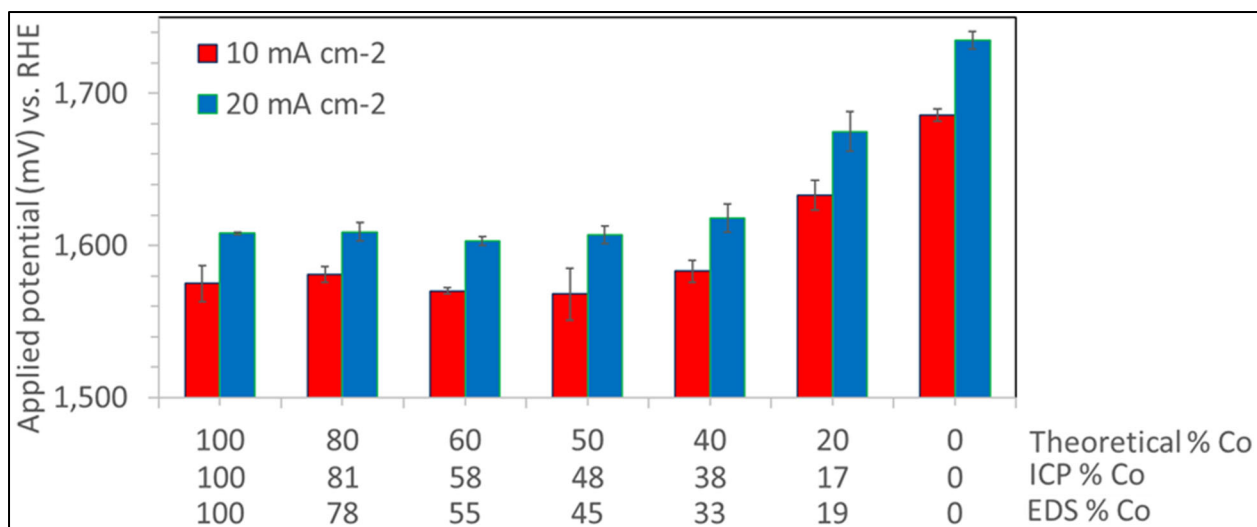

**Figure S26.** OER current density ( $10 \text{ mA cm}^{-2}$  and  $20 \text{ mA cm}^{-2}$ ) changes with % Co (theoretical, ICP, and EDS).

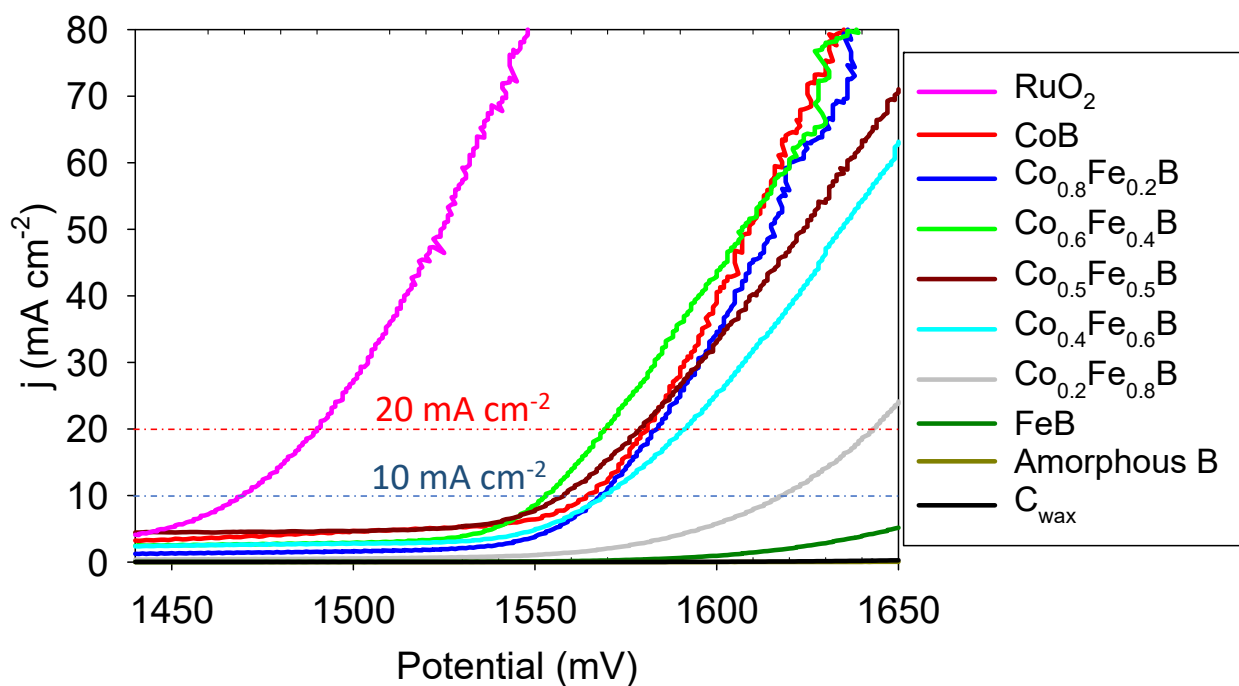

**Figure S27.** OER LSV overlay plots for metal borides with 85% iR compensation at  $5 \text{ mV s}^{-1}$  scan rate. A representative LSV run from 10 LSVs with iR on is shown in the graph. The working electrodes are metal boride powders embedded on  $C_{\text{wax}}$  tips.

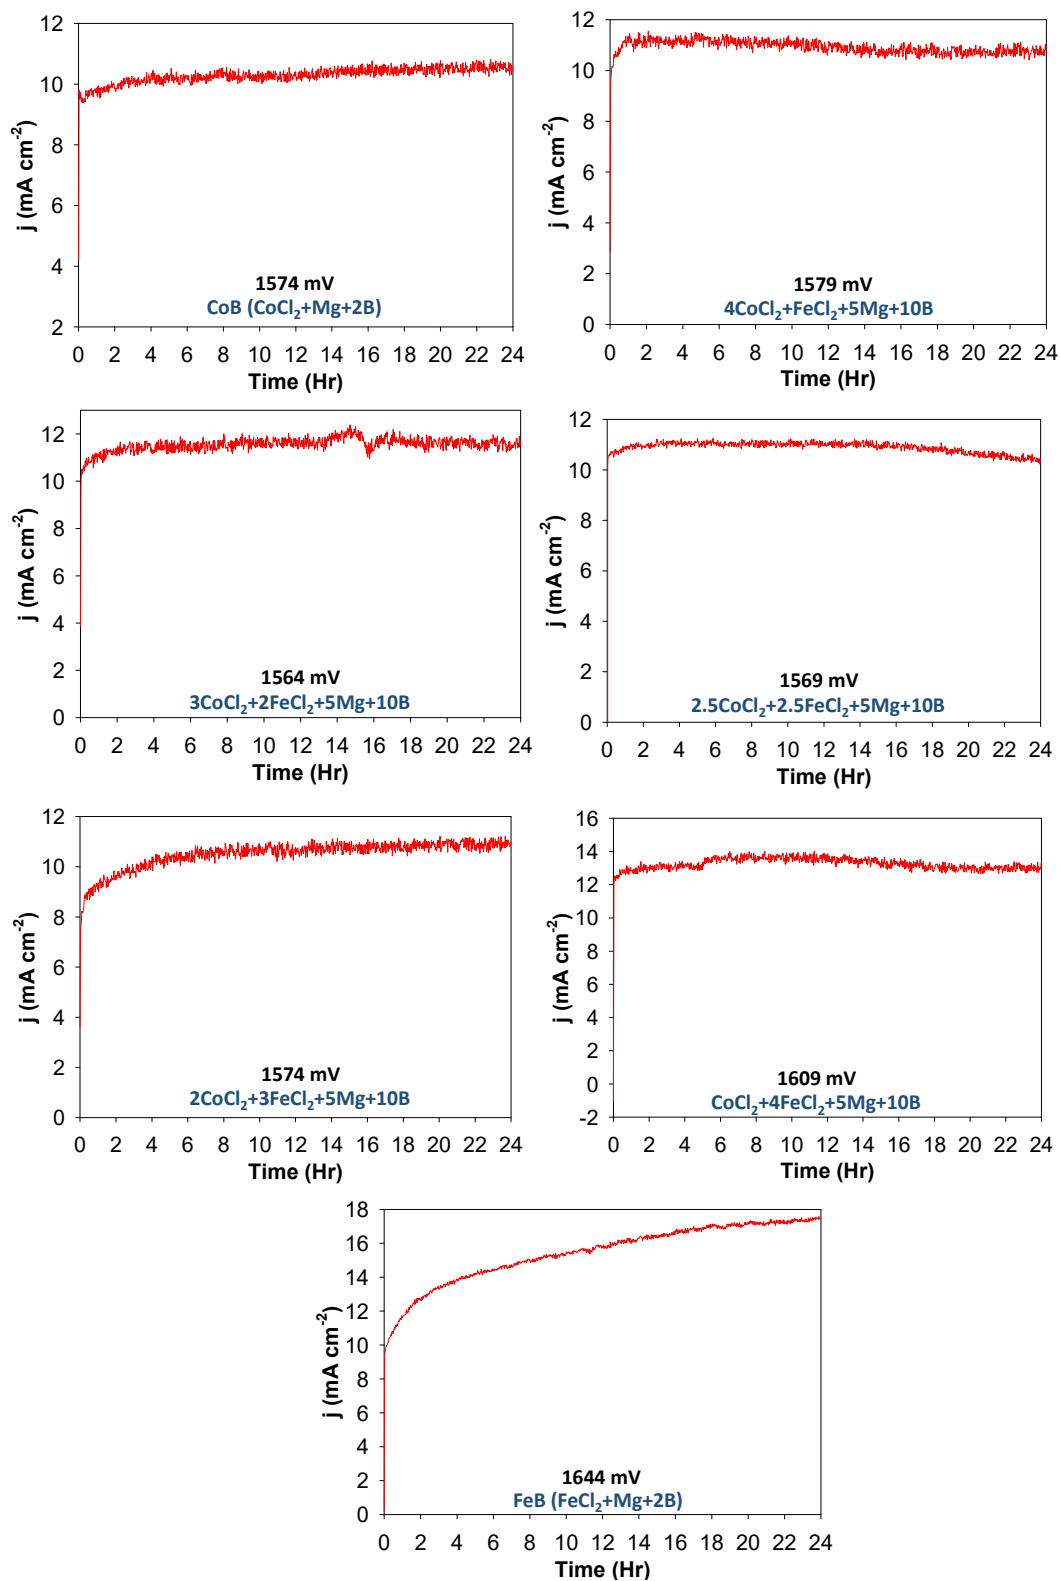

**Figure S28.** Applied positive potential OER chronoamperometry data (current versus time at constant potential) for metal borides in 1.0 M KOH for 24 hrs. The potentials used are indicated and were chosen to ideally sustain 10 mA/cm<sup>2</sup>. The working electrodes are metal boride powders embedded on C<sub>wax</sub> tips.

**Table S12.** Summary of post-chronoamperometry OER electrocatalysis of SSM synthesized metal borides in 1.0 M KOH (average of 10 HERs were reported in the table).

| <b>Sample</b>                         | <b>(<math>\eta_{10}</math>) (mV)<sup>1</sup></b> | <b>(<math>\eta_{20}</math>) (mV)</b> | <b>Tafel (mV/dec)</b> |
|---------------------------------------|--------------------------------------------------|--------------------------------------|-----------------------|
| CoB                                   | 1572.3±2.9<br>(1547.9±2.9)                       | 1603.1±2.2<br>(1554.5±2.4)           | 102<br>(48)           |
| Co <sub>0.8</sub> Fe <sub>0.2</sub> B | 1588.4±2.3<br>(1570.2±2.4)                       | 1621.3±3.3<br>(1584.9±3.1)           | 79<br>(50)            |
| Co <sub>0.6</sub> Fe <sub>0.4</sub> B | 1571.0±1.4<br>(1562.3±1.3)                       | 1603.1±1.7<br>(1584.9±1.7)           | 81<br>(63)            |
| Co <sub>0.5</sub> Fe <sub>0.5</sub> B | 1577.5±2.0<br>(1557.4±1.8)                       | 1614.5±2.5<br>(1574.0±2.7)           | 109<br>(55)           |
| Co <sub>0.4</sub> Fe <sub>0.6</sub> B | 1590.2±3.6<br>(1575.7±3.7)                       | 1626.1±4.7<br>(1597.0±4.9)           | 99<br>(67)            |
| Co <sub>0.2</sub> Fe <sub>0.8</sub> B | 1622.4±6.0<br>(1607.9±5.9)                       | 1656.7±8.3<br>(1627.7±8.2)           | 72<br>(60)            |
| FeB                                   | 1654.7±4.6<br>(1633.7±4.5)                       | 1690.4±6.0<br>(1648.8±5.9)           | 53<br>(45)            |

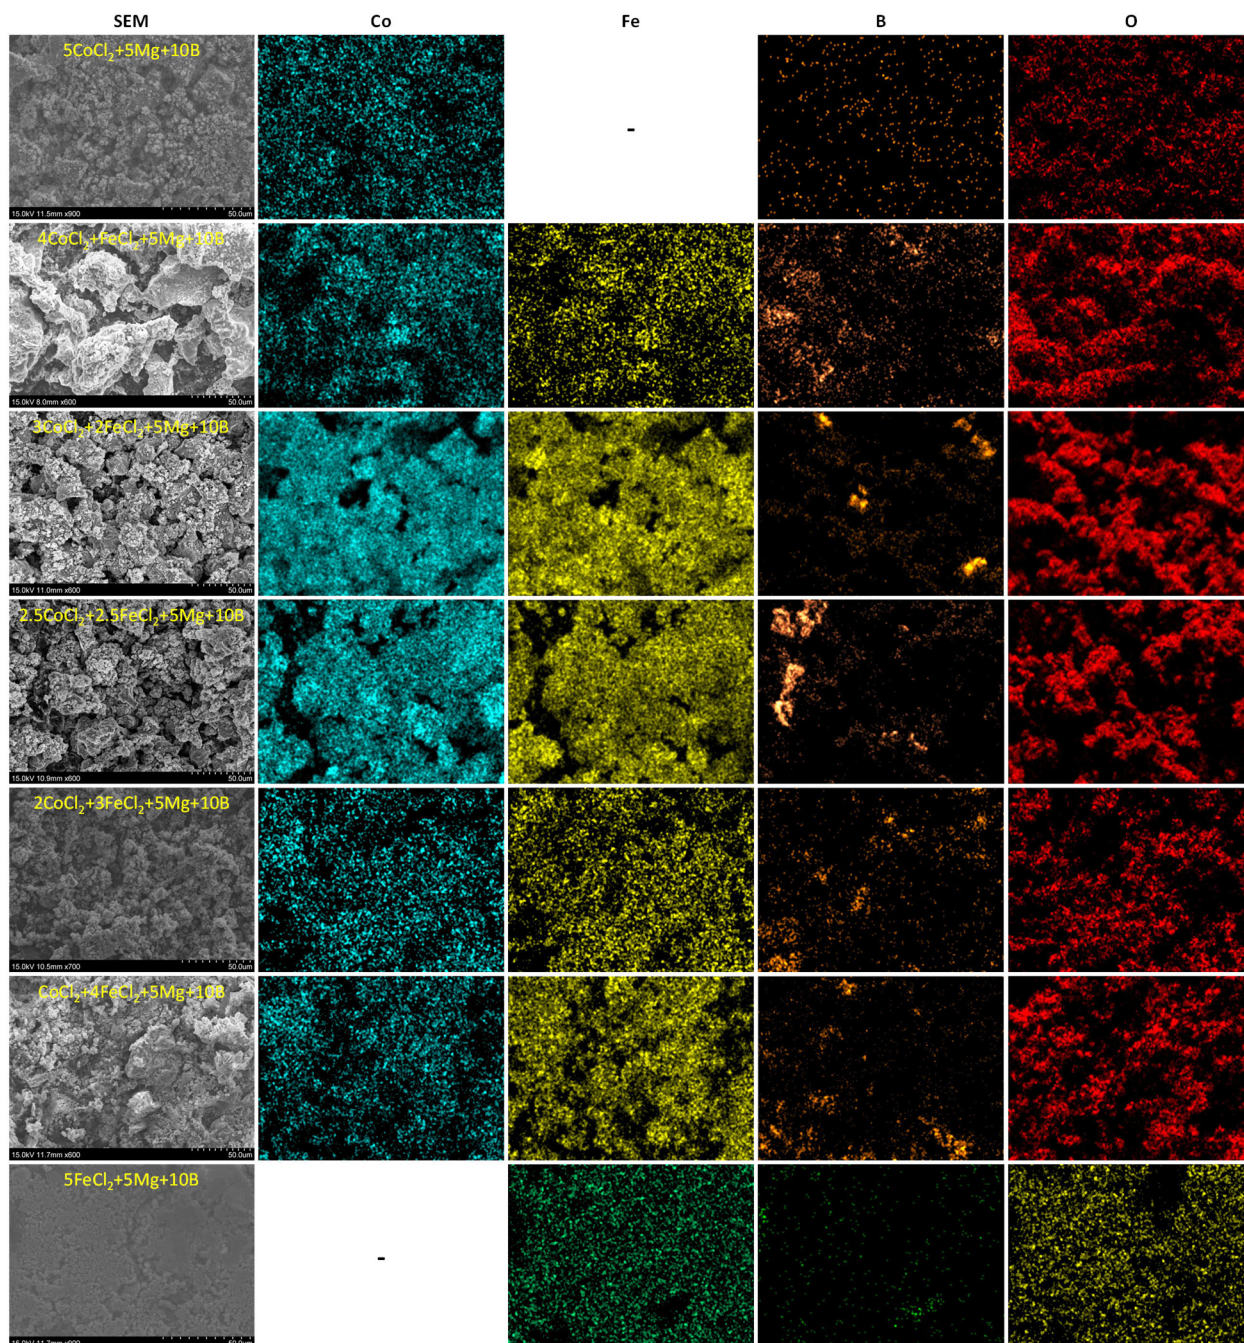

**Figure S29.** Post-positive potential OER chronoamperometry EDS maps of CoB, FeB, and  $\text{Co}_{1-x}\text{Fe}_x\text{B}$  solid-solutions. Images are from powders embedded on  $\text{C}_{\text{wax}}$  tip.

## Reference

- (1) Rao, L.; Gillan, E. G.; Kaner, R. B. Rapid synthesis of transition-metal borides by solid-state metathesis. *J. Mater. Res.* **1995**, *10* (2), 353-361.
- (2) Lupinetti, A. J.; Fife, J. L.; Garcia, E.; Dorhout, P. K.; Abney, K. D. Low-Temperature Synthesis of Uranium Tetraboride by Solid-State Metathesis Reactions. *Inorg. Chem.* **2002**, *41* (9), 2316-2318. DOI: 10.1021/ic015607a.
- (3) Aprea, A.; Maspero, A.; Figini Albisetti, A.; Giunchi, G. Synthesis of Alkaline-earth hexaborides, MB<sub>6</sub> (M = Ca, Ba, Sr), by a solid state metathesis (SSM) reaction. *Solid State Sci.* **2012**, *14* (11-12), 1587-1590. DOI: 10.1016/j.solidstatesciences.2012.03.002.
- (4) Aprea, A.; Maspero, A.; Masciocchi, N.; Guagliardi, A.; Albisetti, A. F.; Giunchi, G. Nanosized rare-earth hexaborides: Low-temperature preparation and microstructural analysis. *Solid State Sci.* **2013**, *21*, 32-36. DOI: 10.1016/j.solidstatesciences.2013.04.001.
- (5) Jothi, P. R.; Zhang, Y.; Scheifers, J. P.; Park, H.; Fokwa, B. P. T. Molybdenum diboride nanoparticles as a highly efficient electrocatalyst for the hydrogen evolution reaction. *Sustainable Energy Fuels* **2017**, *1*, 1928-1934. DOI: 10.1039/c7se00397h.
- (6) Li, Q.; Zou, X.; Ai, X.; Chen, H.; Sun, L.; Zou, X. Revealing Activity Trends of Metal Diborides Toward pH-Universal Hydrogen Evolution Electrocatalysts with Pt-Like Activity. *Adv. Energy Mater.* **2019**, *9*, 1803369. DOI: 10.1002/aenm.201803369.
- (7) Ai, X.; Zou, X.; Chen, H.; Su, Y.; Feng, X.; Li, Q.; Liu, Y.; Zhang, Y.; Zou, X. Transition-Metal-Boron Intermetallics with Strong Interatomic d-sp Orbital Hybridization for High-Performance Electrocatalysis. *Angew. Chem. Int. Ed.* **2020**, *59* (10), 3961-3965. DOI: 10.1002/anie.201915663.
- (8) Zou, X.; Wang, L.; Ai, X.; Chen, H.; Zou, X. Crystal phase-dependent electrocatalytic hydrogen evolution performance of ruthenium-boron intermetallics. *Chem. Commun.* **2020**, *56* (20), 3061-3064. DOI: 10.1039/d0cc00070a.
- (9) Abeysinghe, J. P.; Kolln, A. F.; Gillan, E. G. Rapid and Energetic Solid-State Metathesis Reactions for Iron, Cobalt, and Nickel Boride Formation and Their Investigation as Bifunctional Water Splitting Electrocatalysts. *ACS Mater. Au* **2022**, *2* (4), 489-504. DOI: 10.1021/acsmaterialsau.1c00079.
- (10) Binnewies, M.; Milke, E. *Thermochemical Data of Elements and Compounds*; Weinheim, 1999.
- (11) Kubaschewski, O.; Alcock, C. B. *Metallurgical Thermochemistry*; Pergamon Press Inc., Maxwell House, 1979. *CRC Handbook of Chemistry and Physics, 102nd Edition (Internet Version 2021)*; Rumble, J. R., Ed.; CRC Press/Taylor & Francis. NIST Chemistry Webbook. Standard Reference Database. (accessed 7/5/2021).
- (12) Li, H.; Wen, P.; Li, Q.; Dun, C.; Xing, J.; Lu, C.; Adhikari, S.; Jiang, L.; Carroll, D. L.; Geyer, S. M. Earth-Abundant Iron Diboride (FeB<sub>2</sub>) Nanoparticles as Highly Active Bifunctional Electrocatalysts for Overall Water Splitting. *Adv. Energy Mater.* **2017**, *7* (17), 1700513. DOI: 10.1002/aenm.201700513.
- (13) Ma, X.; Wen, J.; Zhang, S.; Yuan, H.; Li, K.; Yan, F.; Zhang, X.; Chen, Y. Crystal Co<sub>x</sub>B (x = 1-3) Synthesized by a Ball-Milling Method as High-Performance Electrocatalysts for the Oxygen Evolution Reaction. *ACS Sustainable Chem. Eng.* **2017**, *5* (11), 10266-10274. DOI: 10.1021/acssuschemeng.7b02281.
- (14) Klemenz, S.; Schuch, J.; Hawel, S.; Zieschang, A.-M.; Kaiser, B.; Jaegermann, W.; Albert, B. Synthesis of a Highly Efficient Oxygen-Evolution Electrocatalyst by Incorporation of Iron into Nanoscale Cobalt Borides. *ChemSusChem* **2018**, *11* (18), 3150-3156. DOI: 10.1002/cssc.201801547.
- (15) Masa, J.; Weide, P.; Peeters, D.; Sinev, I.; Xia, W.; Sun, Z.; Somsen, C.; Muhler, M.; Schuhmann, W. Amorphous Cobalt Boride (Co<sub>2</sub>B) as a Highly Efficient Nonprecious Catalyst for Electrochemical Water Splitting: Oxygen and Hydrogen Evolution. *Adv. Energy Mater.* **2016**, *6*, 1502313. DOI: 10.1002/aenm.201502313.

- (16) Xu, X.; Deng, Y.; Gu, M.; Sun, B.; Liang, Z.; Xue, Y.; Guo, Y.; Tian, J.; Cui, H. Large-scale synthesis of porous nickel boride for robust hydrogen evolution reaction electrocatalyst. *Appl. Surf. Sci.* **2019**, *470*, 591-595. DOI: 10.1016/j.apsusc.2018.11.127.
- (17) Masa, J.; Piontek, S.; Wilde, P.; Antoni, H.; Eckhard, T.; Chen, Y.-T.; Muhler, M.; Apfel, U.-P.; Schuhmann, W. Ni-Metalloid (B, Si, P, As, and Te) Alloys as Water Oxidation Electrocatalysts. *Adv. Energy Mater.* **2019**, *9*, 1900796. DOI: 10.1002/aenm.201900796.
- (18) Jothi, P. R.; Zhang, Y.; Yubuta, K.; Culver, D. B.; Conley, M.; Fokwa, B. P. T. Abundant Vanadium Diboride with Graphene-like Boron layers for Hydrogen Evolution. *ACS Appl. Energy Mater.* **2019**, *2* (1), 176-181. DOI: 10.1021/acsaem.8b01615.
- (19) Mazanek, V.; Nahdi, H.; Luxa, J.; Sofer, Z.; Pumera, M. Electrochemistry of layered metal diborides. *Nanoscale* **2018**, *10* (24), 11544-11552. DOI: 10.1039/c8nr02142b.
- (20) Kirshenbaum, M. J.; Richter, M. H.; Dasog, M. Electrochemical Water Oxidation in Acidic Solution Using Titanium Diboride (TiB<sub>2</sub>) Catalyst. *ChemCatChem* **2019**, *11* (16), 3877-3881. DOI: 10.1002/cctc.201801736.
- (21) Lim, C. S.; Sofer, Z.; Mazanek, V.; Pumera, M. Layered titanium diboride: towards exfoliation and electrochemical applications. *Nanoscale* **2015**, *7* (29), 12527-12534. DOI: 10.1039/c5nr02692j.
- (22) Zhuang, Z.; Li, Y.; Li, Z.; Lv, F.; Lang, Z.; Zhao, K.; Zhou, L.; Moskaleva, L.; Guo, S.; Mai, L. MoB/g-C<sub>3</sub>N<sub>4</sub> Interface Materials as a Schottky Catalyst to Boost Hydrogen Evolution. *Angew. Chem. Int. Ed.* **2018**, *57* (2), 496-500. DOI: 10.1002/anie.201708748.
- (23) Wang, Y.; Mayorga-Martinez, C. C.; Chia, X. Y.; Sofer, Z.; Latiff, N. M.; Pumera, M. Bipolar Electrochemistry as a Simple Synthetic Route toward Nanoscale Transition of Mo<sub>2</sub>B<sub>5</sub> and W<sub>2</sub>B<sub>5</sub> for Enhanced Hydrogen Evolution Reaction. *ACS Sustainable Chem. Eng.* **2019**, *7* (14), 12148-12159. DOI: 10.1021/acssuschemeng.9b01251.
- (24) Guo, F.; Wu, Y.; Ai, X.; Chen, H.; Li, G.-D.; Chen, W.; Zou, X. A class of metal diboride electrocatalysts synthesized by a molten salt-assisted reaction for the hydrogen evolution reaction. *Chem. Commun.* **2019**, *55* (59), 8627-8630. DOI: 10.1039/c9cc03638e.
- (25) Nsanzimana, J. M. V.; Peng, Y.; Xu, Y. Y.; Thia, L.; Wang, C.; Xia, B. Y.; Wang, X. An Efficient and Earth-Abundant Oxygen-Evolving Electrocatalyst Based on Amorphous Metal Borides. *Adv. Energy Mater.* **2018**, *8*, 1701475. DOI: 10.1002/aenm.201701475.
- (26) Zieschang, A.-M.; Bocarsly, J. D.; Schuch, J.; Reichel, C. V.; Kaiser, B.; Jaegermann, W.; Seshadri, R.; Albert, B. Magnetic and Electrocatalytic Properties of Nanoscale Cobalt Boride, Co<sub>3</sub>B. *Inorg. Chem.* **2019**, *58*, 16609-16617. DOI: 10.1021/acs.inorgchem.9b02617.
- (27) Gupta, S.; Patel, N.; Miotello, A.; Kothari, D. C. Cobalt-Boride: An efficient and robust electrocatalyst for Hydrogen Evolution Reaction. *J. Power Sources* **2015**, *279*, 620-625. DOI: 10.1016/j.jpowsour.2015.01.009.
- (28) Gupta, S.; Patel, N.; Fernandes, R.; Kadrekar, R.; Dashora, A.; Yadav, A. K.; Bhattacharyya, D.; Jha, S. N.; Miotello, A.; Kothari, D. C. Co-Ni-B nanocatalyst for efficient hydrogen evolution reaction in wide pH range. *Appl. Catal. B* **2016**, *192*, 126-133. DOI: 10.1016/j.apcatb.2016.03.032.
- (29) Li, Y.; Xu, H.; Huang, H.; Gao, L.; Zhao, Y.; Ma, T. Synthesis of Co-B in porous carbon using a metal-organic framework (MOF) precursor: A highly efficient catalyst for the oxygen evolution reaction. *Electrochem. Commun.* **2018**, *86*, 140-144.
- (30) Jiang, Y.; Fang, Y.; Chen, C.; Ni, P.; Kong, B.; Song, Z.; Lu, Y.; Niu, L. Amorphous Cobalt Boride Nanosheets Directly Grown on Nickel Foam: Controllable Alternately Dipping Deposition for Efficient Oxygen Evolution. *ChemElectroChem* **2019**, *6* (14), 3684-3689. DOI: 10.1002/celec.201900897.
- (31) Hao, W.; Wu, R.; Zhang, R.; Ha, Y.; Chen, Z.; Wang, L.; Yang, Y.; Ma, X.; Sun, D.; Fang, F.; et al. Electroless Plating of Highly Efficient Bifunctional Boride-Based Electrodes toward Practical Overall Water Splitting. *Adv. Energy Mater.* **2018**, *8* (26), 1801372. DOI: 10.1002/aenm.201801372.

- (32) Tan, T.; Han, P.; Cong, H.; Cheng, G.; Luo, W. An Amorphous Cobalt Borate Nanosheet-Coated Cobalt Boride Hybrid for Highly Efficient Alkaline Water Oxidation Reaction. *ACS Sustainable Chem. Eng.* **2019**, *7*, 5620-5625. DOI: 10.1021/acssuschemeng.9b00258.
- (33) Arivu, M.; Masud, J.; Umapathi, S.; Nath, M. Facile synthesis of Ni<sub>3</sub>B/rGO nanocomposite as an efficient electrocatalyst for the oxygen evolution reaction in alkaline media. *Electrochem. Commun.* **2018**, *86*, 121-125. DOI: 10.1016/j.elecom.2017.12.002.
- (34) Masa, J.; Andronesco, C.; Antoni, H.; Sinev, I.; Seisel, S.; Elumeeva, K.; Barwe, S.; Marti-Sanchez, S.; Arbiol, J.; Cuenya, B. R.; et al. Role of Boron and Phosphorus in Enhanced Electrocatalytic Oxygen Evolution by Nickel Borides and Nickel Phosphides. *ChemElectroChem* **2019**, *6*, 235-240. DOI: 10.1002/celec.201800669.
- (35) Zeng, M.; Wang, H.; Zhao, C.; Wei, J.; Qi, K.; Wang, W.; Bai, X. Nanostructured Amorphous Nickel Boride for High-Efficiency Electrocatalytic Hydrogen Evolution over a Broad pH Range. *ChemCatChem* **2016**, *8* (4), 708-712. DOI: 10.1002/cctc.201501221.
- (36) Cao, M.; Zhang, X.; Qin, J.; Liu, R. Enhancement of Hydrogen Evolution Reaction Performance of Graphitic Carbon Nitride with Incorporated Nickel Boride. *ACS Sustainable Chem. Eng.* **2018**, *6* (12), 16198-16204. DOI: 10.1021/acssuschemeng.8b02994.
- (37) Zhao, S.; Xu, S.; Yao, J.; Chen, N.; Gong, Y.; Zhang, X.; Hao, X.; Zhang, L.; Pei, C.; Tian, R.; et al. Elucidating the reaction pathway of crystalline multi-metal borides for highly efficient oxygen-evolving electrocatalysts. *J. Mater. Chem. A* **2022**, *10* (3), 1569-1578. DOI: 10.1039/d1ta09078j.
- (38) Zou, X.; Zhang, W.; Zhou, X.; Song, K.; Ge, X.; Zheng, W. The surface of metal boride tinted by oxygen evolution reaction for enhanced water electrolysis. *J. Energy Chem.* **2022**, *72*, 509-515. DOI: 10.1016/j.jechem.2022.05.0392095-4956.
- (39) Patil, K.; Babar, P.; Li, X.; Karade, V.; Kim, S.; Jang, S. Y.; Bhoite, P.; Kim, J. H. Co-Fe-B Nanochain Electrocatalysts for Oxygen Evolution at High Current Density. *ACS Appl. Nano Mater.* **2022**, *5* (5), 6260-6267. DOI: 10.1021/acsnm.2c00312.
- (40) Liu, X.; He, G.; Liu, H.; Zhu, Y.; Xiao, J.; Han, L. Boron-doped cobalt-iron bimetal phosphides nanosheets for enhanced oxygen evolution. *J. Alloys Compd.* **2022**, *893*. DOI: 10.1016/j.jallcom.2021.162208.
- (41) Wang, N.; Xu, A.; Ou, P.; Hung, S. F.; Ozden, A.; Lu, Y. R.; Abed, J.; Wang, Z.; Yan, Y.; Sun, M. J.; et al. Boride-derived oxygen-evolution catalysts. *Nat. Commun.* **2021**, *12* (1), 6089. DOI: 10.1038/s41467-021-26307-7.
- (42) Qiang, C.; Zhang, L.; He, H.; Liu, Y.; Zhao, Y.; Sheng, T.; Liu, S.; Wu, X.; Fang, Z. Efficient electrocatalytic water splitting by bimetallic cobalt iron boride nanoparticles with controlled electronic structure. *J. Colloid Interface Sci.* **2021**, *604*, 650-659. DOI: 10.1016/j.jcis.2021.07.024.
- (43) Nsanzimana, J. M. V.; Gong, L.; Dangol, R.; Reddu, V.; Jose, V.; Xia, B. Y.; Yan, Q.; Lee, J. M.; Wang, X. Tailoring of Metal Boride Morphology via Anion for Efficient Water Oxidation. *Adv. Energy Mater.* **2019**, *9* (28), 1901503. DOI: 10.1002/aenm.201901503.
- (44) Mann, D. K.; Xu, J.; Mordvinova, N. E.; Yannello, V.; Ziouani, Y.; Gonzalez-Ballesteros, N.; Sousa, J. P. S.; Lebedev, O. I.; Kolen'ko, Y. V.; Shatruk, M. Electrocatalytic water oxidation over AlFe<sub>2</sub>B<sub>2</sub>. *Chem. Sci.* **2019**, *10* (9), 2796-2804. DOI: 10.1039/c8sc04106g.
- (45) Li, Y.; Huang, B.; Sun, Y.; Luo, M.; Yang, Y.; Qin, Y.; Wang, L.; Li, C.; Lv, F.; Zhang, W.; et al. Multimetal Borides Nanochains as Efficient Electrocatalysts for Overall Water Splitting. *Small* **2019**, *15*, 1804212. DOI: 10.1002/smll.201804212.
- (46) Sheng, M.; Wu, Q.; Wang, Y.; Liao, F.; Zhou, Q.; Hou, J.; Weng, W. Network-like porous Co-Ni-B grown on carbon cloth as efficient and stable catalytic electrodes for hydrogen evolution. *Electrochem. Commun.* **2018**, *93*, 104-108. DOI: 10.1016/j.elecom.2018.06.017.

- (47) Gupta, S.; Patel, N.; Fernandes, R.; Hanchate, S.; Miotello, A.; Kothari, D. C. Co-Mo-B Nanoparticles as a non-precious and efficient Bifunctional Electrocatalyst for Hydrogen and Oxygen Evolution. *Electrochim. Acta* **2017**, *232*, 64-71. DOI: 10.1016/j.electacta.2017.02.100.
- (48) Chen, H.; Ouyang, S.; Zhao, M.; Li, Y.; Ye, J. Synergistic Activity of Co and Fe in Amorphous Co<sub>x</sub>-Fe-B Catalyst for Efficient Oxygen Evolution Reaction. *ACS Appl. Mater. Interfaces* **2017**, *9* (46), 40333-40343. DOI: 10.1021/acsami.7b13939.
